# Supplementary material
Source: PubMed Central journal article supplement (PMC5502650)
Supplement: pnas.1706752114.sapp.pdf [file pnas.1706752114.sapp.pdf]

**A new stem caecilian from the Triassic of Colorado sheds light  
on the origins of Lissamphibia**

Supporting Information

Jason D. Pardo, Bryan J. Small, and Adam K. Huttenlocker

Correspondence author: Adam K. Huttenlocker (email: [ahuttenlocker@gmail.com](mailto:ahuttenlocker@gmail.com))

DOI: 10.1073/pnas.1706752114

**SI Appendix Table of Contents**

**Supporting Information – Appendix Figures and Captions**

**Appendix – Materials, Methods, Discussion**

**Part A. Geologic Setting**

**Part B. Full Description**

**Part C. Phylogenetic Character List**

**Part D. NEXUS Scripts**

**Part E. *Chinlestegophis* and ‘Lissamphibian Characters’**

**Part F. Burrowing in *Chinlestegophis***

**Part G. SI Figure List**

**Part H. SI HRXCT Movies**

**Part I. References Cited in Supporting Information**

Supporting Information – Appendix Figures and Captions

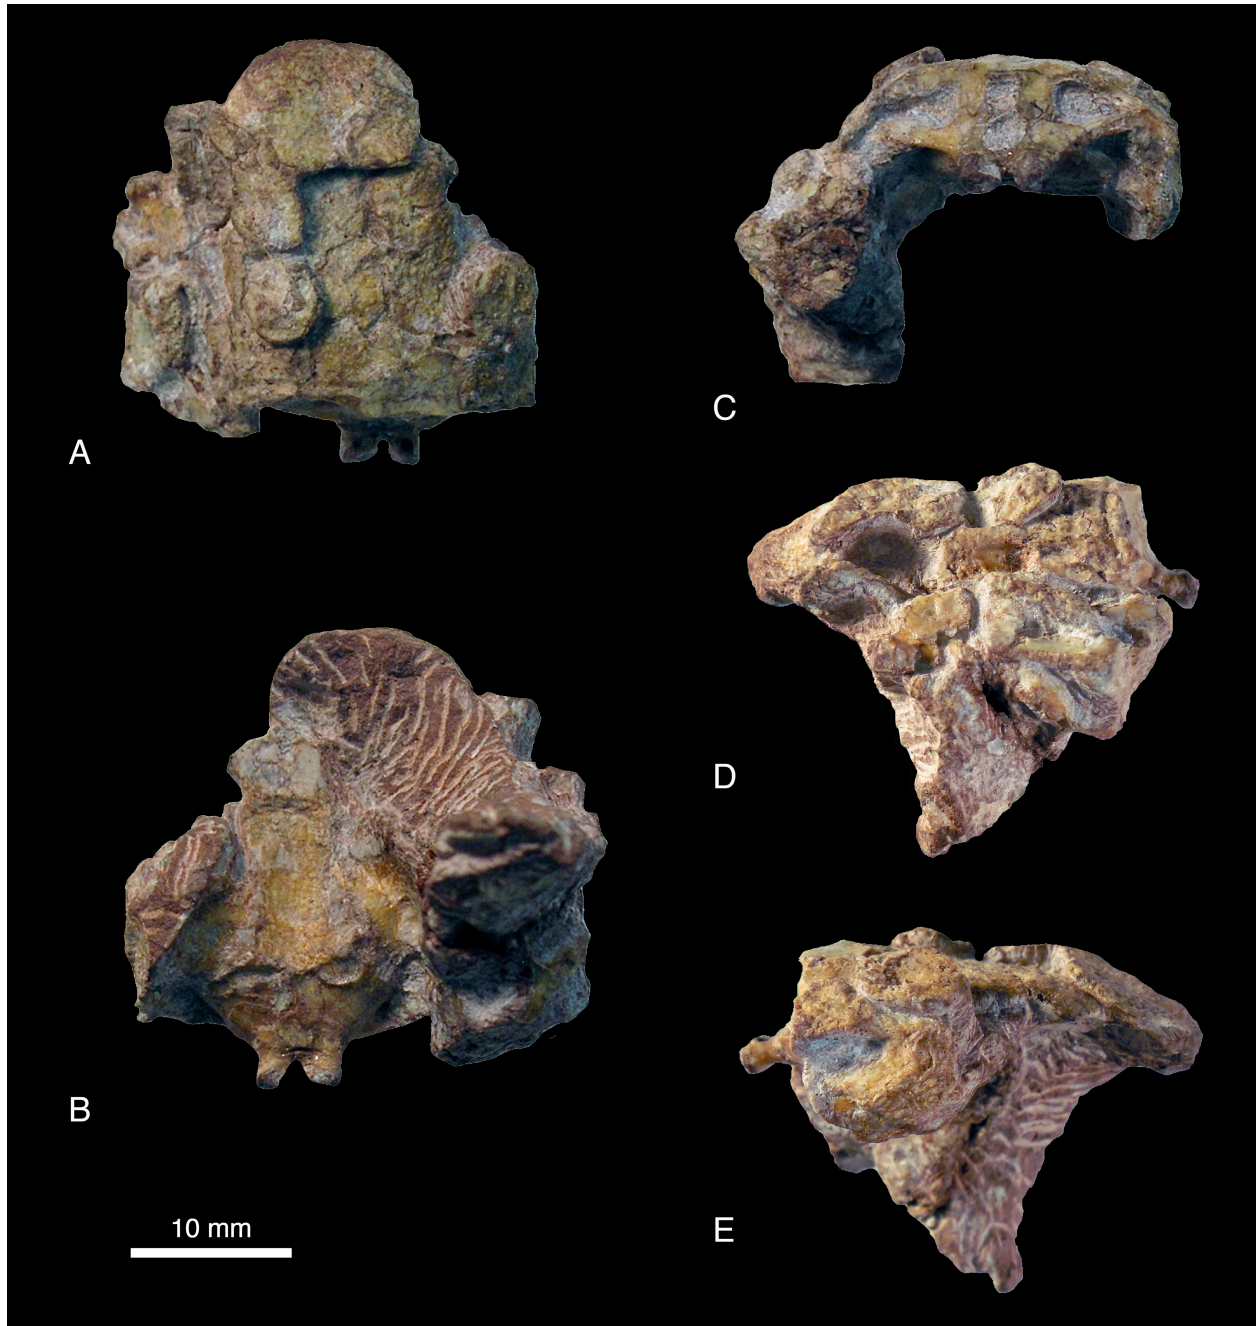

**Figure S1.** Photograph of *Chinlestegophis jenkinsi* gen. et sp. nov. Holotypic skull (DMNH 56658) in dorsal (A), ventral (B), occipital (C), left lateral (D), and right lateral (E) views.

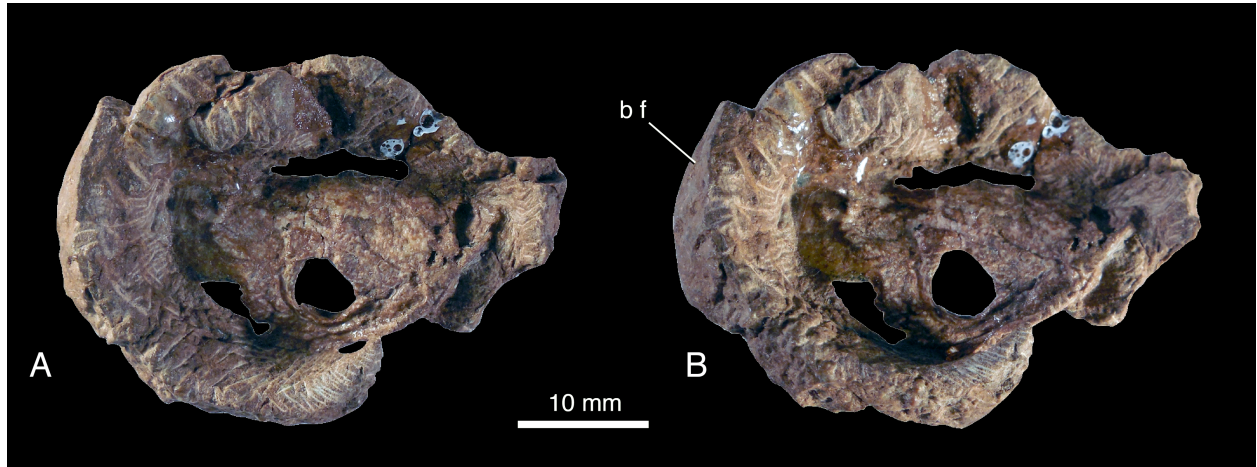

**Figure S2. Photograph of *Chinlestegophis jenkinsi* gen. et sp. nov.** Referred specimen (DMNH 39033) in burrow shown in dorsal (*A*) and slight oblique dorsolateral (*B*) views. Note that the diameter of the burrow-fill (b f) closely approximates the width of the occupant.

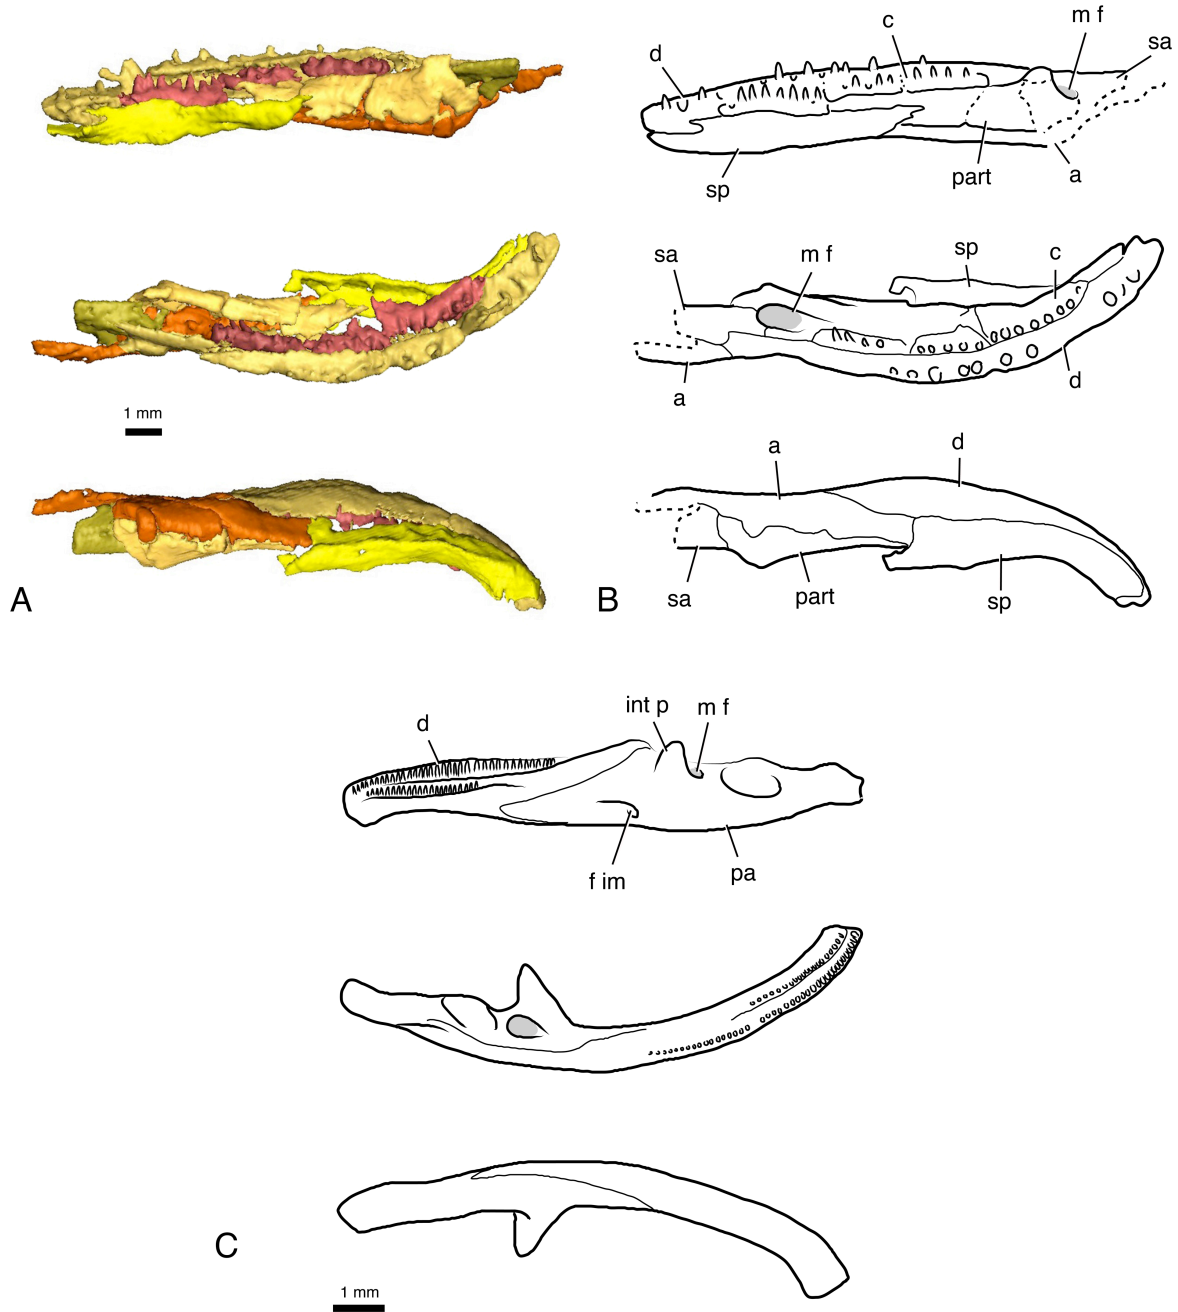

**Figure S3. Right lower jaws of *Chinlestegophis* (A, B) and *Eocaecilia* (C) compared.** In A–C jaws are shown in medial (top), dorsal (middle), and ventral (bottom) views. ‘C’ is redrawn from Jenkins et al. (2007). Abbreviations: a, angular; c, coronoid; d, dentary; f im, intramandibular foramen; int p, internal process; m f, mandibular (adductor) fossa; pa, pseudoangular; part, prearticular; sa, surangular; sp, splenial.

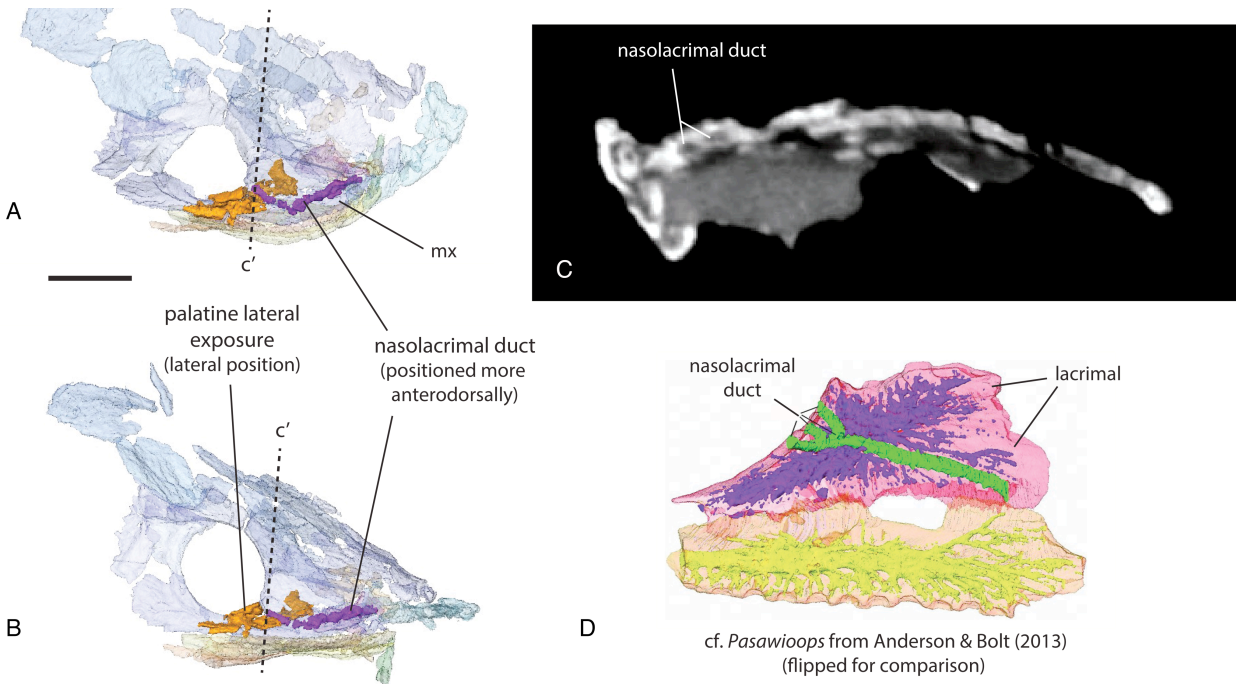

**Figure S4. Fate of the lacrimal ossification in *Chinlestegophis*.** Position of nasolacrimal duct (purple) and palatine bone (orange) in referred specimen (DMNH 39033) in dorsal (*A*) and lateral (*B*) views, and passage of nasolacrimal duct in maxilla shown in transverse section (*C*). Passage of nasolacrimal duct (green) in lacrimal bone of *Pasawioops mayi* (adapted from Anderson and Bolt, 2013) shown for comparison. Scale is 5 mm in '*A*' and '*B*', dashed line shows approximate position of '*C*', '*C*' and '*D*' not to scale. Abbreviations: mx, maxilla.

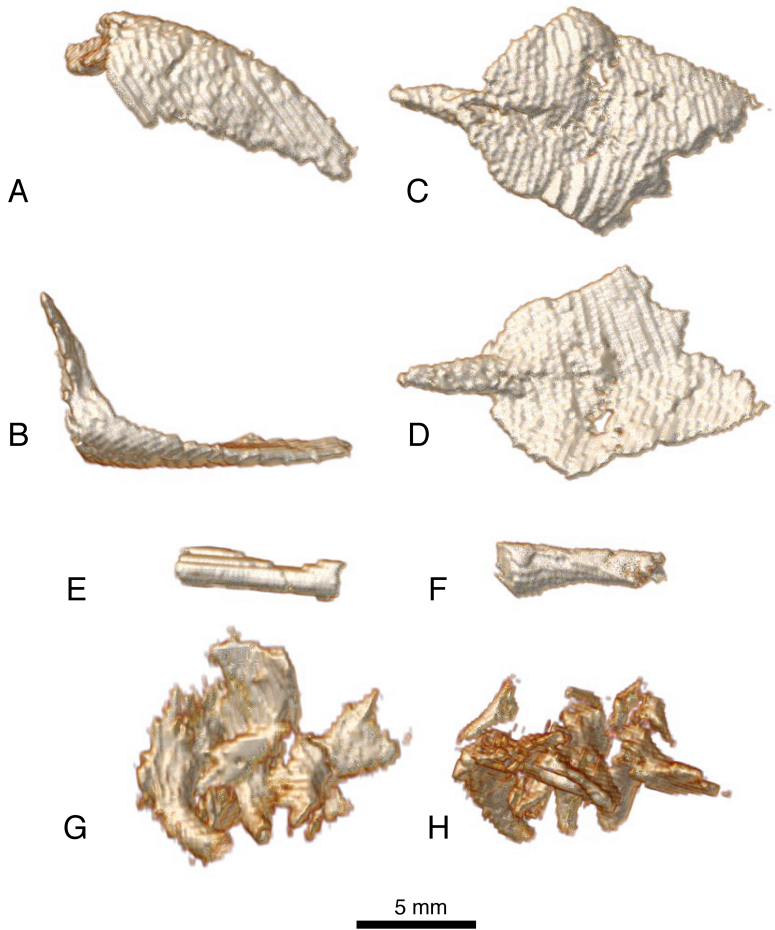

**Figure S5. Postcrania of *Chinlestegophis* holotype (DMNH 56658).** Right clavicle in ventral (*A*) and lateral (*B*) views (anterior to right). Interclavicle in ventral (*C*) and dorsal (*D*) views. Isolated limb element (ulna?) in lateral (*E*) and medial (*F*) views. Three articulated neural arches lacking their centra in left lateral (*G*) and dorsal (*H*) views (anterior to left).

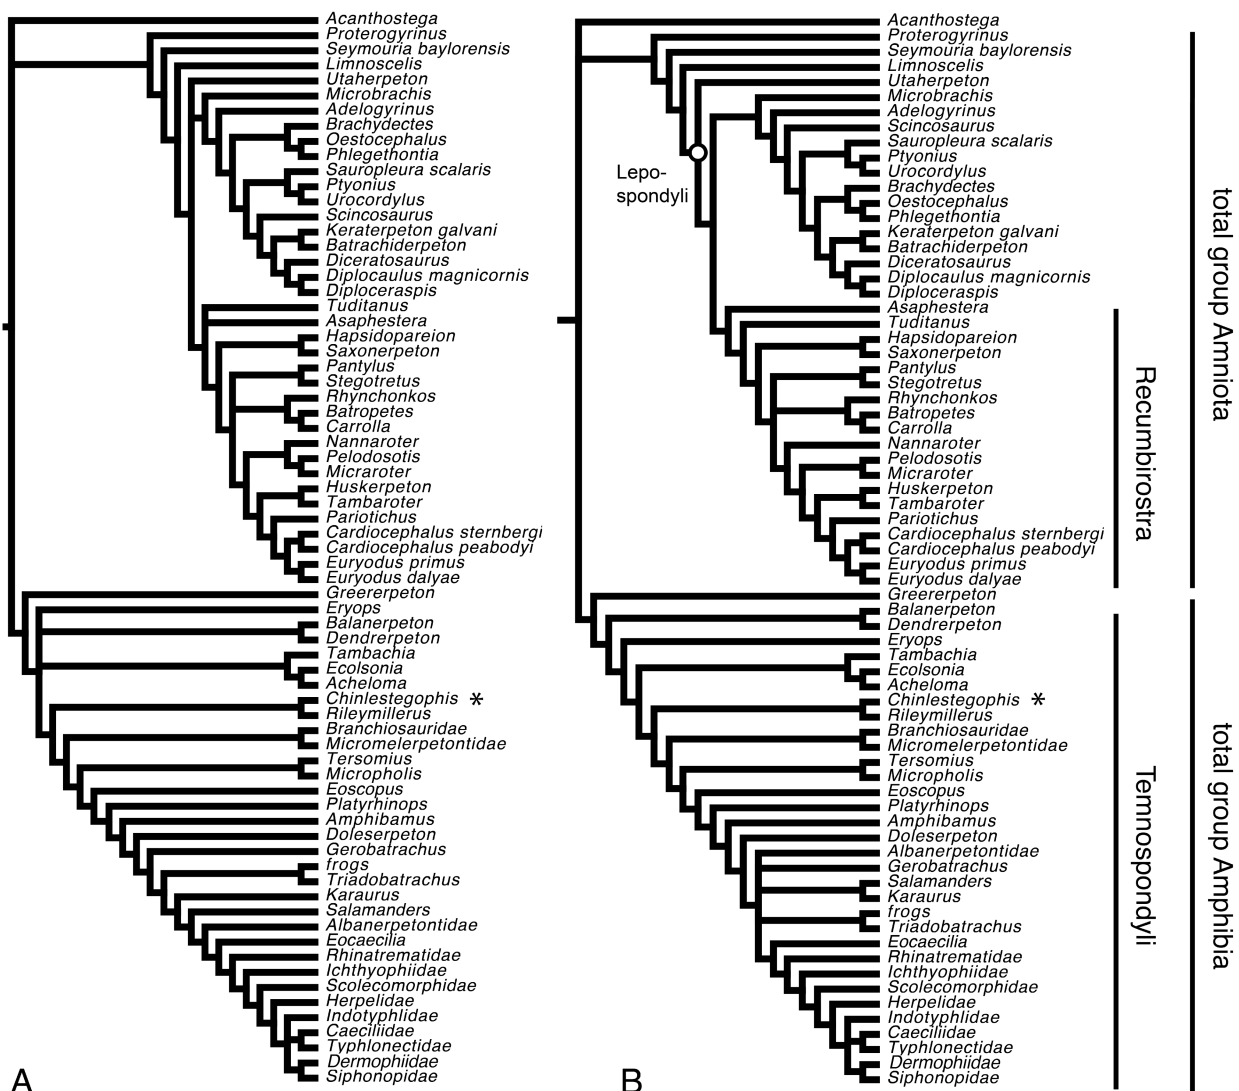

**Figure S6. *Chinlestegophis* and *Rileymillerus* added to Maddin et al. data set (no other stereospondyl characters or taxa).** Tree topologies from cladistic analysis using the matrix of Maddin (2012b) place *Chinlestegophis* (asterisk) and caecilians outside lepospondyls and within Temnospondyli, but in phylogenetically disparate subclades. Note that no other stereospondyls were included in the original publication, resulting in an undersampling of stereospondyl characters. The two topologies are based on runs using Bayesian (*A*) and parsimony (*B*) analysis in MrBayes and PAUP\* 4.0, respectively. Parsimony tree in '*B*' is a strict consensus of 12 equally parsimonious trees (1450 steps).

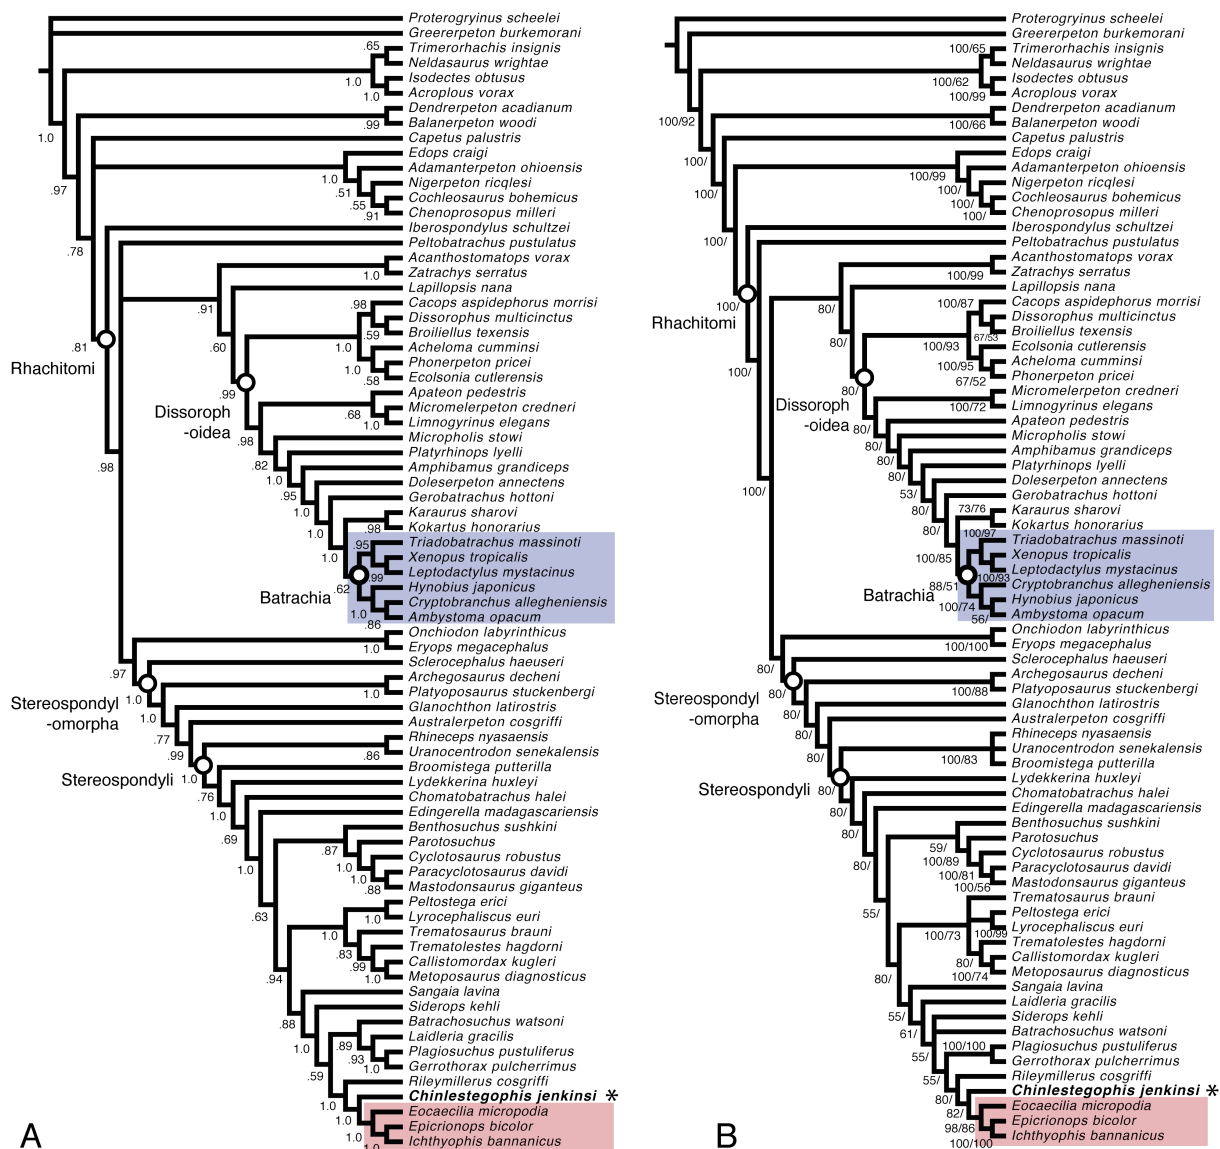

**Figure S7. *Chinlestegophis* and *Rileymillerus* added to combined matrix with stereospondyl characters and taxa.** Note that analysis combining matrices of Schoch (i.e., with stereospondyls) and Maddin resolve the positions of *Chinlestegophis*, *Rileymillerus*, and *Eocaecilia* within Stereospondyli. The clade in blue represents early batrachians (frogs and salamanders), whereas that in red represents early caecilian-like stereospondyls, including *Chinlestegophis* as a close sister taxon (asterisk). The two topologies are based on (A) Bayesian consensus cladogram from analysis in MrBayes and (B) 50% majority rule consensus of 882 equally parsimonious trees (1514 steps) from parsimony analysis in PAUP\* 4.0. Bayesian posterior probabilities are shown at nodes in 'A' and consensus indices (left of virgule) and bootstrap values equal to or greater than 50% (right of virgule) in 'B.' The complete character list and source matrix is included in Supporting Information Part C & D.



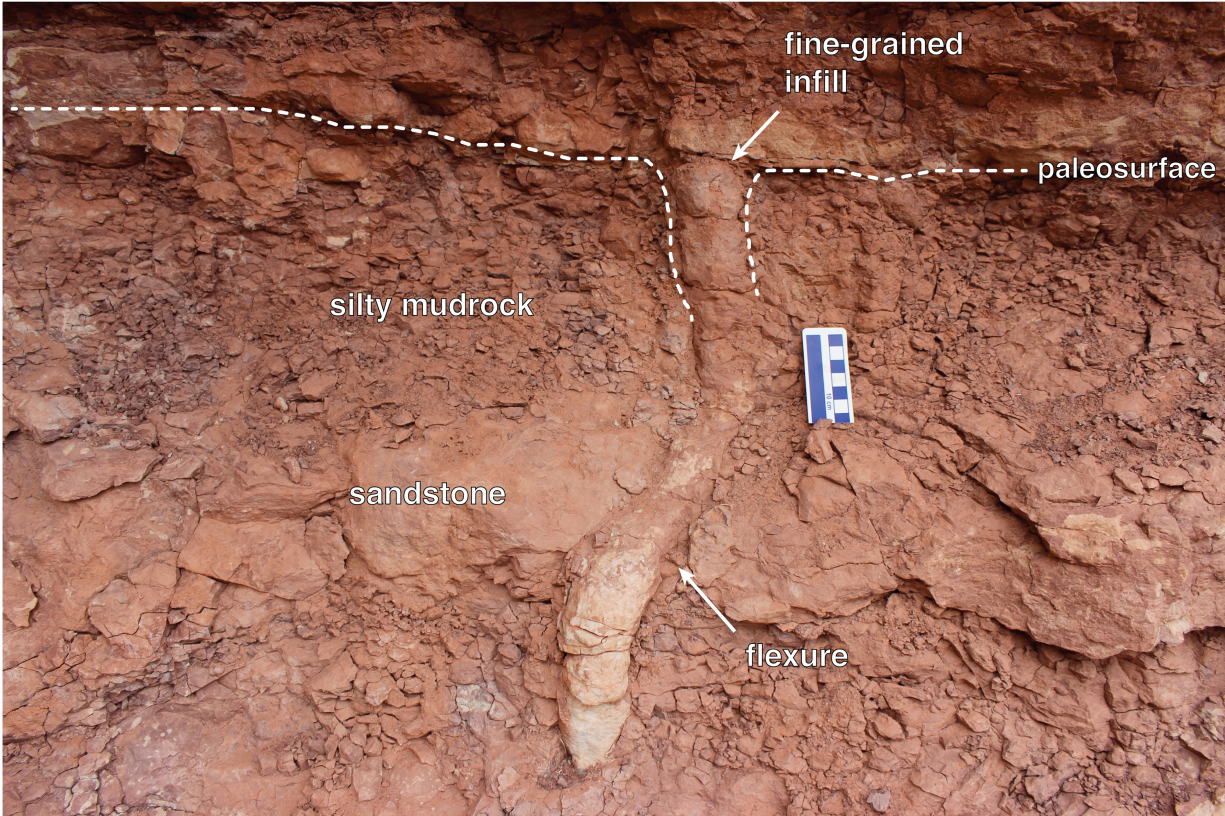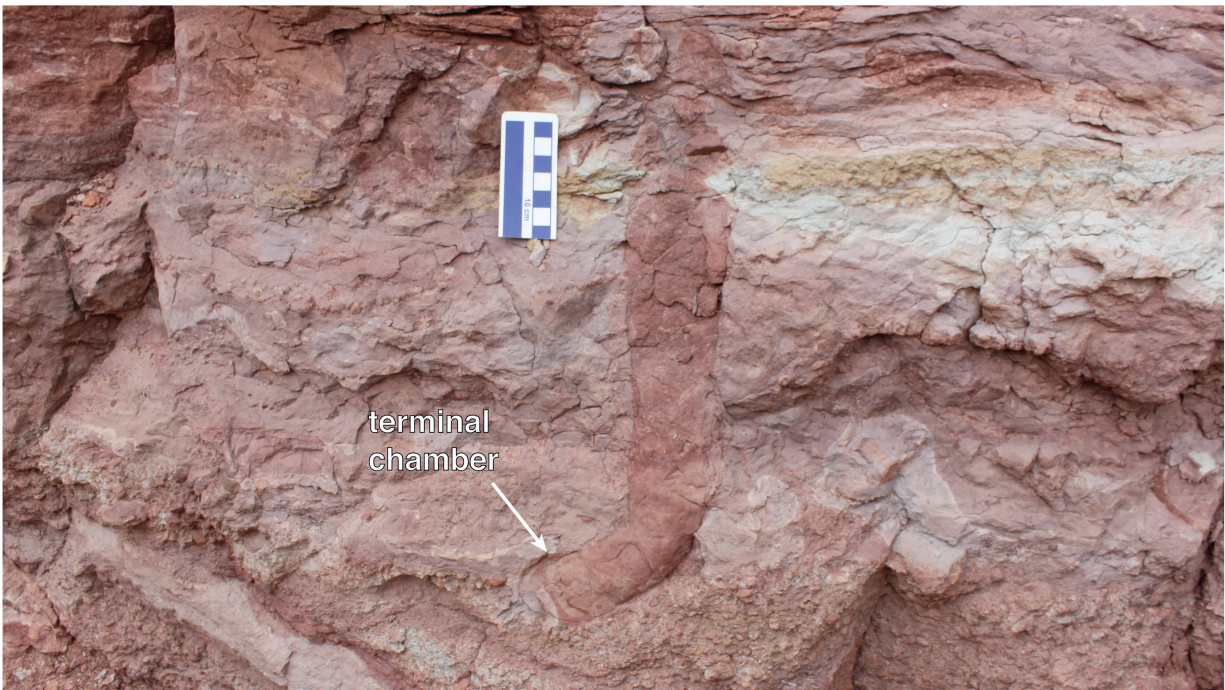

**Figure S8. Burrow structures from the Chinle Formation near Derby Junction, Eagle Basin, Colorado.**

## Appendix – Materials, Methods, Discussion

### Part A. Geologic Setting

The specimens (DMNH 56658 and 39033) were collected from the Chinle Formation of the Eagle Basin in northwestern Colorado. The Chinle Formation sediments of Eagle Basin were derived from the Ancestral Rocky Mountains (the Ancestral Front Range and Uncompahgre Uplift), which cut off the Eagle Basin from most of the rest of the Chinle Formation (Stewart et al., 1972; Dubiel, 1992).

The Chinle Formation in the study area consists of steep, bench-forming units composed of complex fluvial sandstones, floodplain mudstones, paleosols, and eolian sands (Dubiel, 1992). The Chinle Formation in the Eagle Basin is divided into two units; the lower Gartra Member, including the Mottled Member of (Stewart et al., 1972), and the informal upper ‘red siltstone’ member. The Chinle Formation locally sits unconformably on top of the Middle Triassic State Bridge Formation or the Permian Maroon Formation, and is unconformably overlain by the Middle Jurassic Entrada Sandstone (Dubiel, 1992). The temnospondyls of this study were collected from the middle of the informal ‘red siltstone’ member, in a stratigraphic interval approximately 30–60 meters below the upper contact with the Entrada Sandstone (Small and Martz, 2013).

The holotype (DMNH 56658) was collected by BJS from the Main Elk Creek locality in Garfield County near Newcastle, Colorado. The Main Elk Creek locality is a rich multispecies assemblage of terrestrial vertebrates ranging from isolated elements to disarticulated, associated specimens (Small, 1998, 2001, 2009). The holotype was found in a discrete cluster of small, poorly preserved bones, including ribs and limb elements that are presumed to belong to the holotype. The bones at the Main Elk Creek locality are preserved in a red siltstone/mudstone with small carbonate pebbles probably deposited in an overbank flooding event.

The referred specimen (DMNH 39033) was collected at the Derby Junction locality in Eagle County, Colorado. The Derby Junction locality is a horizon with thin interbedded sandstones, siltstones and mudstones, along with some thicker mudstones, interpreted here as point-bar and flood plain deposits. Fossils here are rare, with shuvosaurid and silesaurid remains, along with some possible isolated phytosaur teeth (Small, 2009).

There are no radioisotopic dates for the Chinle Formation in the Eagle Basin. Direct correlation with members of the Chinle Formation of the Colorado Plateau is not possible due to the isolation of the Eagle Basin by the Uncompahgre Uplift and Ancestral Rocky Mountains. A tentative biostratigraphic correlation with the rest of the Chinle Formation is possible with four taxa recovered from the Eagle Basin.

The dinosauromorph *Dromomeron romeri* (Irmis et al., 2007; Nesbitt et al., 2009) (e.g. DMNH 54826) has been recovered from Main Elk Creek (Small, 2009). The holotype and all referred material of *D. romeri* are from Revueltian age localities in the Petrified Forest Member of the Chinle Formation of New Mexico (Nesbitt et al., 2009).

The leptopleuronine procolophonid *Libognathus sheddi* (Small, 1997) (DMNH 56657) is also known from Main Elk Creek. The holotype and referred material of *L. sheddi* are from Revueltian age localities (possibly upper Adamanian for the holotype) in the Dockum Group of Texas (Small, 1997; Martz, 2008). The other known leptopleuronine procolophonid from the Late Triassic of the western USA is the ‘Abajo form’ from the Owl Rock Member of the Chinle Formation, also considered Revueltian in age (Fraser et al., 2005).

Numerous bones of a large spiny aetosaur are known from Main Elk Creek (Martz et al., 2003) and are similar to *Rioarribasuchus chamaensis* (Lucas et al., 2006; Parker, 2007). *R. chamaensis* is known from the Revueltian age Petrified Forest Member of the Chinle Formation of New Mexico and Arizona (Parker, 2016).

Small aetosaurs, including *Stenomyti huangae* (Small and Martz, 2013) are also known from the Eagle Basin localities (Small, 1998; Small and Martz, 2013), and are similar to the small aetosaur *Aetosaurus* (Schoch, 2007) and osteoderms of small aetosaurs in the Revueltian age Bull Canyon Formation of New Mexico (Heckert and Lucas, 1998). The shared presence of these taxa suggest that the ‘red siltstone’ member falls at least partially within the Revueltian land vertebrate faunachron (Nesbitt et al., 2009; Martz, 2008), which is primarily middle–late Norian in age (Parker and Martz 2011).

## Part B. Full Description

Tetrapoda Haworth, 1825  
Temnospondyli Zittel, 1888  
Stereospondyli Zittel, 1887

*Chinlestegophis jenkinsi* gen. et sp. nov.

**Etymology.** Jenkins’s amphibian-serpent from the Chinle. ‘Chinle’ for the Triassic Chinle Formation; ‘stego-’ (Greek) meaning cover or roof, but commonly applied to temnospondyl amphibians and other early tetrapods; ‘-ophis’ (Greek) meaning serpent. Species name honors paleontologist Farish Jenkins whose work on the Jurassic *Eocaecilia* inspired the present study.

**Holotype.** Denver Museum of Nature & Science (DMNH) 56658, partial skull with lower jaw and disarticulated postcrania. Discovered by BJS in 1999 in the Upper Triassic Chinle Formation (‘red siltstone’ member), Main Elk Creek locality, Garfield County, Colorado (DMNH loc. 1306). The tetrapod assemblage is regarded as middle-late Norian in age (Revueltian land vertebrate faunachron). More specific locality information is on file at DMNH and U. S. Bureau of Land Management.

**Referred material.** DMNH 39033, anterior skull and partial lower jaw preserved in burrow fill. Also discovered by BJS in 1997 in the Upper Triassic Chinle Formation (‘red siltstone’ member) of Eagle County, Colorado (DMNH loc. 692).

**Diagnosis.** Small stereospondyl with a combination of brachyopoid and caecilian characteristics. Unique features: Lateral line sulcus restricted to suborbital margins of jugal and postorbital; parietal-tabular narrowly contact (may be shared with *Compsoceros*); postfrontal anterior process long, forming the majority of the dorsomedial border of the orbit; finger-like process of prefrontal interlocks with notch on postfrontal. Shares with stereospondyls: parasphenoid strongly sutured to pterygoid, supratemporal excluded from otic notch, secondary upper tooth row. Shares with stereospondyls and caecilians: opisthotics fused to exoccipitals. Shares with brachyopoids and caecilians: lacrimal fused to maxilla; two small posterior processes (‘horns’) on the occipital exposure of the tabular, just posterior to otic notch (as in chigutisaurids). Shares

with *Rileymillerus* and some other small temnospondyls: palatine exposed laterally in ventral margin of the orbit (LEP). Shares with *Rileymillerus* and caecilians: orbits small and laterally directed. Shares with caecilians: double tooth row on mandible; quadrate completely anterior to ear; broad, parallel-sided parasphenoid cultriform process >20% skull width; occipital condyles extend far beyond posterior edge of skull roof; pterygoquadrate. Shares with some other temnospondyls but not caecilians: large, laterally-directed otic notch.

## Description

**General.** The specimens DMNH 56658 and 39033 are semiarticulated skulls with portions of the lower jaw. The holotype, DMNH 56658, also preserves associated postcrania. The restored skull length is approximately 25-30 mm. The skull roof, cheek, and angular portion of the lower jaw bear fine but elaborate sculpturing that is fairly evenly distributed (rather than radiating). The dorsal profile of the skull is narrow and parallel-sided with small, laterally-oriented orbits. The lateral line canals are extremely reduced, limited to the suborbital border, and some circumorbital bones are also highly reduced, particularly the postorbital, which is narrow and falciform. No separate lacrimal is present. The quadratojugal is also either absent or extremely reduced in size and the jaw articulation is in a forward position, well anterior to the occiput. The postorbital region is tall with a steep occiput, producing a wedge-shaped skull in lateral aspect.

**Skull roof.** The antorbital region in DMNH 39033 is low and bluntly rounded in dorsal view. Lateral line sulci are absent from the anterior skull roof, but are present on the margins of the orbit. The premaxilla is poorly preserved, but can be seen bordering the naris on the right side of the skull. The right external naris preserves its triangular shape and is closely set to the midline. The nasal forms the posterior border of the naris. It is short and broad and bears a sinuous median suture. It is bordered posteriorly by the frontal, laterally by the prefrontal and maxilla, and anteriorly by the naris and premaxilla. The maxilla is missing in the holotype and is incompletely preserved in DMNH 39033 where it is apparently missing the marginal tooth row. The maxilla is preserved as a long, low element that participates in the naris anteriorly and tapers posteriorly to its termination point beneath the palatine and jugal. No details of the maxillary dentition are preserved in either specimen.

The circumorbital bones form a small orbit (< 20% skull length) that is laterally oriented. Anteroventrally, a short, splint-like lateral exposure of the palatine (LEP) is present on the orbital wall. In *Rileymillerus cosgriffi*, a similarly positioned element, also limited to the orbital wall, was interpreted as a LEP by Bolt and Chatterjee (2000) and was reinterpreted as a lacrimal by Schoch (2008) and Martz et al. (2013:fig. 4), although the latter interpretation is less likely given the situation in the closely-related *Chinlestegophis* and new CT scans of *Rileymillerus* by the authors. Although convention would be to recognize these elements as a lacrimal, the bone in *Chinlestegophis* is continuous with a denticulate palatal element and is in the correct location to be an expansion of the dermal palate into the orbital margin (LEP), rather than an ossification that organized around the nasolacrimal canal (lacrimal). Furthermore, the tetrapod lacrimal is characterized by its position between the orbit and naris, where it encloses the nasolacrimal duct. This close relationship between the nasolacrimal duct and the lacrimal is probably inductive, as experiments ablating the nasolacrimal duct placode in hynobiid salamanders appear to prevent formation of the lacrimal bone as well (Medvedeva, 1960). In *Chinlestegophis* the channel likely representing the passage of the nasolacrimal duct is enclosed by the dorsal lamina of the maxilla

(see *SI Appendix* Fig. S4) in similar position to the passage of the nasolacrimal duct in other temnospondyls, such as amphibamids (Anderson and Bolt, 2013). This strongly suggests that the lack of a separate lacrimal is due to fusion of the lacrimal to the maxilla in *Chinlestegophis* (as in caecilians; see Muller, 2006) rather than fusion to the prefrontal (as in salamanders; Lebedkina, 2004) or loss of a lacrimal anlage (as in frogs, Stephenson, 1951).

The jugal forms the entire lateral wall of the orbit and sends a long process to the anterior border of the orbit which sutures to the prefrontal as in brachyopoids. It bears a deep sulcus. Dorsally and medially to the thin LEP, a broad, quadrangular prefrontal forms the anteromedial wall of the orbit. Given the apparent absence of a separate lacrimal, the majority of the anterior margin of the orbit is formed by the prefrontal. As in most temnospondyls, the prefrontal is abbreviated anteriorly and does not contact the external naris. Moreover, the element is at least as broad as it is long, mirroring the condition in *R. cosgriffi*. Posteromedially the prefrontal forms a sutural contact with the postfrontal, forming the orbit's dorsomedial margin and precluding the frontal from contact with the orbit. Most of this margin is formed, however, by the long anterior process of the postfrontal. The postfrontal is also large and quadrangular, but is longer than the prefrontal and extends well posterior to the frontal-parietal suture, nearly to the level of the pineal foramen. Posteriorly, the postfrontal contacts the parietal, supratemporal, and postorbital. The postorbital is a tall, crescent-shaped bone that forms the entire posterior border of the orbit. Its ventrolateral margin bears a slight sulcus that is confluent with that of the jugal, representing the remnants of the circumorbital lateral line canal.

Between the orbits, the frontal is the dominant element. Notably, it is positioned fairly far forward with the frontal-parietal suture located between the orbits rather than at their posterior extent or beyond. The frontal is slightly longer than the nasal, but shorter than the parietal, so that these three elements of the medial series increase slightly in their relative lengths from rostral to caudal. The parietal is long and rectangular with fairly straight sutural connections to communicating bones. The midline suture is also fairly straight. Though slightly damaged in the holotype, a small pineal foramen can be seen on the parietal midline suture about halfway along its length at about the level of the postfrontal-supratemporal contact. The reduced size of the pineal foramen may be reflective of a decreased reliance on light-sensing functions of the pineal organ during the transition to fossoriality (see Supplementary Information Part F, Burrowing in *Chinlestegophis*).

The squamosal is a large, crescentic element that forms the majority of the border of the otic notch. It is bordered anteriorly by the jugal and postorbital, dorsally by the supratemporal and tabular, ventromedially by the pterygoid, and is open posteriorly. The otic notch is large and more laterally directed in comparison to other stereospondyls, located close to the posterior margin of the orbit and is nearly closed-off posteriorly. The dorsal margin of the otic notch is formed by a narrow supratympanic flange that expands posteriorly into a quadrate-directed process. Ventrally, a broad and elongate suture between the squamosal and pterygoid process of the quadrate forms a strongly-developed ridge approximating the semilunar flange of dissorophoids. Unlike many dissorophoids, there is no supratympanic participation of the supratemporal in the otic notch. The supratemporal instead resides dorsally and medially to the otic region, and its circular shape and position are nearly identical to the 'tabular' of *Eocaecilia* (Jenkins et al., 2007). We reinterpret the topologically corresponding element in *Eocaecilia* as a supratemporal, and note its similarly loosely set articulations with surrounding elements (Jenkins et al., 2007:fig. 2). Importantly, Jenkins et al. (2007) note the lack of interdigitating sutures, and

the presence of ventral lappets on the surrounding skull bones that supported this element in *Eocaecilia*, an arrangement also exhibited here in *Chinlestegophis*.

The postparietal and tabular form the rearmost portions of the skull roof. The postparietal is short and broad, roughly rectangular, and is mostly exposed dorsally with only a small occipital flange. It is bordered anteriorly by the parietal, laterally by the tabular, and posteromedially by ascending processes of the exoccipital that bound the foramen magnum. Along with the tabular, it also forms a portion of the roof of the posttemporal fenestra. The tabular is a comparatively broader element that is well exposed both dorsally and laterally. It roofs the rear portion of the otic notch and also forms a portion of its posterior border with a strong semilunate flange. A transverse ridge extends from the postparietal to the tabular, forming an “occipital crest” that delineates the dorsolateral and occipital faces of each element. Posterior to this partition, two modest protuberances project from the occipital face of the tabular. These processes may correspond to a rudimentary tabular horn, but their size and unusual topological relationship to the otic notch makes this homology uncertain. However, it is similar in position to the “tabular horn” of some brachyopoids, particularly *Batrachosuchus* and *Vigilius* (Warren and Marsicano, 2000).

**Braincase and occiput.** Major portions of the anterior and lateral walls of the braincase are unossified in *Chinlestegophis*. The parabasisphenoid bears a broad basal plate with extensive sutural connections to the pterygoids laterally (forming a strong basicranial girder). Based on the preserved posterior portion in DMNH 56658, the cultriform process is equally broad having a spatulate appearance that is parallel-sided, differing from that of many early stereospondyls where it usually forms an anteriorly tapering wedge. As a result, the interpterygoid vacuities would have been fairly narrow compared to other temnospondyls. The anterior extent of the parasphenoid is not preserved, so that its connection to the vomer cannot be confirmed. There are no denticles on the cultriform process. The sphenethmoid complex is unossified dorsal to the parasphenoid.

The co-ossified exoccipital-opisthotic complex forms the dominant structure of the occiput. These elements appear to be fused ventral to the exoccipital condyles with no obvious midline suture. In general, the left and right portions form a tripartite structure with dorsal, transverse (paroccipital), and anteroventral processes. The dorsal process extends within the synotic tectum where it forms a broad surface dorsal to the foramen magnum and braces against the skull roof (postparietal). The transverse or paroccipital process is a broad, strut-like extension of the crista parotica that extends to the tabular, forming the posterodorsal wall of the stapedial canal. A large posttemporal fenestra is present between the synotic tectum, paroccipital process, and posterior skull roof. The fenestra is relatively large compared to other stereospondyls, approximately double the size of the foramen magnum.

The occipital condyles show the typical stereospondyl condition, formed as paired processes of the exoccipitals having a deeply saddled structure and projecting somewhat posterior to the occiput. The paired articular surfaces appear as flat (rather than convex) facets that are angled somewhat posteromedially.

**Palate and splanchnocranium.** Few details of the palate of *Chinlestegophis* can be gleaned because the anterior portion of the snout of DMNH 56658 is not preserved and much of the palate is missing in DMNH 39033. However, the posterior portions of both pterygoids are preserved in DMNH 5668 and some elements of the anterior palate can be identified from CT

scans of DMNH 39033. Preserved elements include portions of the vomers, which bear vomerine tusks, palatines, and pterygoids, although the ectopterygoids are absent.

In general, the posterior palate has a strongly vaulted appearance. The pterygoids are preserved in place in the holotype, and resemble most closely brachyopoids (e.g., brachyopids and chigutisaurids). There are no pterygoid teeth or denticles. The palatal rami of the pterygoids are broken on both sides so that their anterior extent and relation to the interpterygoid vacuity cannot be determined. Medially there is an extensive sutural contact with the parabasisphenoid. Dorsally, there is a tall and anteroposteriorly long ascending lamina (dorsal lamina of the quadrate ramus) that contacts a medial flange of the squamosal (visible on both sides in occipital view). On the right side of the holotypic skull, the quadrate ramus maintains its strong posterolateral orientation and preserves a sharp ventral keel. The keel extends well below the floor of the braincase and contributes to the strongly vaulted skull. Notably, the forward position of the pterygoid and its concave posterolateral face suggest a jaw joint that was placed well anterior to the occiput. Moreover, although the cheek is imperfectly preserved in both specimens, CT scans reveal that the posterior ramus of the pterygoid sutures directly to an internal flange of the squamosal on the floor of the otic notch, and is not mediated by contact with a quadratojugal. This condition is suggestive that the quadratojugal was highly reduced or completely absent in *Chinlestegophis*. A separate quadrate is not evident in either side of the skull, but it is likely that the saddle-shaped posterolateral face of the pterygoid represents the articular glenoid, and we hypothesize that this therefore represents a fused pterygoid-quadrate element (pterygoquadrate).

**Lower jaw.** Large portions of the mandible are preserved in both specimens, including the dentary, splenial, prearticular, portions of the coronoids, angular, and surangular. In general, the size and compliment of bones that make up the mandible (specifically the postdentary bones) are reduced compared to most other Triassic stereospondyls. The dentary is a long, shallow element that is laterally expanded along the region of the tooth row and curves strongly toward the symphysis (resulting in a markedly rounded anterior jaw). Its external surface is relatively smooth-textured with little sculpturing. It is fairly shallow mesially (toward the symphysis) but becomes more deepened distally where it accommodates the postdentary bones on the medial surface. The medial surface, which borders the Meckelian canal, is broadly concave.

On the medial surface of the mandible, a long series of three coronoid elements is preserved in the attributed specimen (disarticulated or absent in the holotype), and bears a row of teeth that are slightly smaller than those in the dentary. The tooth row runs parallel to the marginal dentition resulting in a functional double tooth row as in caecilians (rather than a shagreen of denticles as in most Palaeozoic and Triassic total group amphibians). No postsplenial could be identified ventral to the anterior coronoid in either specimen. The prearticular is extensive, forming the majority of the Meckelian window dorsally, and the splenial forming the ventrolateral portion of the Meckelian canal. Posteriorly, the prearticular broadens toward the coronoid region and its articulation with the surangular, forming the medial border of the mandibular fossa. Though slightly swollen mediolaterally, this region lacks the internal process that is developed in *Eocaecilia*. The angular is situated ventral and lateral to the prearticular and makes up a large portion of the mandible in lateral view. It is deeper than the dentary and bears rugose sculpturing. The dorsal contact with the surangular is difficult to discern, but probably was positioned high on the jaw behind the dentary as in *Rileymillerus* (Bolt and Chatterjee, 2000:fig. 4) and *Callistomordax* (Schoch, 2008:fig. 1). Though poorly preserved, the surangular appears to have been extremely reduced.

**Dentition.** The present dental description is limited to the lower (mandibular) dentition, as most of the dentigerous elements of the upper jaw are poorly preserved or absent. There are at least 13 dentary teeth and probably more, but the posterior extent of the tooth row is not well preserved. The marginal teeth appear as tiny, isodont cones that are subequal in size. They lack any clear indication of heterodonty or bicuspidity. A dividing zone between pedicel and crown is not evident, but this may be a result of insufficient resolution of the CT data, or presence of a pedicel without a true dividing zone, a distinction which must be made histologically. CT scans of the holotypic jaw show small accessory teeth anteriorly in the dentary that are closely associated with the anteriormost marginals, suggesting the presence of symphyseal tusks. Just medial to the marginal dentition, a second tooth row is present on the coronoid elements. The row parallels that of the dentary. The individual teeth are also isodont cones that are similar in size to the marginals but slightly smaller. These formed a complete functional second tooth row, in contrast to the condition observed in most stereospondyls, where the coronoid dentition is restricted to the posteriormost coronoid, or is comprised solely of a denticle shagreen.

**Postcrania.** A limited amount of postcranial material is preserved in the holotype, including the dermal components of the pectoral girdle, an isolated limb element, several vertebrae, and a number of ribs (*SI Appendix* Fig. S5). The pectoral girdle consists of interclavicle and paired clavicles. The interclavicle is diamond-shaped but narrow, with a short posterior stem. The clavicles have large triangular dermal plates with a narrow stem, as in other temnospondyls. Vertebral arches are present with well-developed transverse processes and a high neural spine. Centra are not preserved.

### Part C. Phylogenetic Character List

List of 345 craniodental and postcranial characters used in the complete analysis (with stereospondyls included). Characters 1–212 correspond to those from Schoch (2013), characters 213–309 (A1–A217) correspond to those from Anderson et al. (2008), and characters 310–312 (H220–H227) correspond to those added by Huttenlocker et al. (2013) (with invariant characters removed (e.g., those corresponding to Lepospondyli which were excluded) and redundant characters from 1–212 omitted in all cases). Characters 314–340 (M1–M112) correspond to those added by Maddin et al. (2012a). Characters N2–N5 were added by Maddin et al. (2012b) and N6–N8 are new. Some codings for *Eocaecilia* were modified from Maddin et al. (2012b) due to reinterpretation of “tabular” element as the supratemporal (see included NEXUS script).

#### Skull roof characters (from Schoch, 2013)

1. Skull (outline). Parabolic (0), or triangular with pointed tip (1).
2. Skull (height). Skull of variable height, but occiput always deeper than snout (0), or extremely flattened to equal height throughout (1).
3. Ornament (elements). Reticulate ridges of various sizes (0), or isolated pustules (1).
4. Ornament (snout). Polygons or short grooves (0), or mostly radial, elongated grooves (1).
5. Ornament (general). Shallow ridges of variable height (0), or high ridges throughout (1).



6. Ornament (intensive growth). Elongated ridges ('zones of intensive growth') confined to snout only (0), or prepineal growth zone established on extended anterior parietal and postorbital (1).
7. Ornament (preorbital). Zone of subdued ornament on the medial skull bones adjacent to the midline suture absent (0), or present (1).
8. Spines. Absent (0), or present along lateral flank of quadratojugal (1).
9. Preorbital region (length). Less than twice the length of posterior skull table (0), or more (1).
10. Premaxilla (alary process). Absent (0), or present, forming a posterior hook-like indentation (1).
11. Premaxilla (prenarial portion). Short (0), or very expanded, equalling the length of the frontal (1).
12. Premaxilla (outline). Parabolically rounded (0), or box-like and anteriorly blunt (1).
13. Premaxillary foramen. Premaxilla and nasal completely sutured (0), or medially bearing an opening separating the two alary processes of the premaxilla (1).
14. Premaxillary fontanelle. Premaxillae with or without small opening (0), or encircling large fenestra extending posteriorly between the nasals (1).
15. Snout (internarial distance). Narrower than interorbital distance (0), or wider (1).
16. Nasal (width). Nasal longer than wide (0), or as wide as long (1).
17. Naris (position). At lateral margin of snout, opening laterally (0), or set well medially, opening anteriorly (1).
18. Naris (extension). Naris uniform, with oval shaped margin (0), or posteriorly expanded with distinct anterior and posterior regions giving external overall "key-hole" shape (1).
19. Naris (flange). Ventral (inner) side of prefrontal, lacrimal, and nasal smooth (0), or bearing a complicated bar-like structure (narial flange) permitting contact with the antorbital bar (1).
20. Nasal (lateral margin). Straight (0), or stepped, with lateral excursion anterior to lacrimal (1).
21. Lacrimal. Present (0), or absent (1).
22. Lacrimal (lateral suture). Parallels medial suture (0), or lateral suture posterolaterally expanded to give broader preorbital region (1).
23. Lacrimal (position). Extending anterior to orbit (0), or confined to lateral orbit margin (1).
24. Lacrimal (posterior extension). Restricted to the antorbital region (0), or extending back lateral to orbit (1).
25. Orbit and naris. Well separated (0), or separated only by tiny quadrangular lacrimal (1).
26. Orbit location. Medial, framed by wide jugals laterally (0), or lateral emplacement, framed by very slender jugals (1).
27. Orbit margins. Raised well above skull plain (0), or flush with roof (1).
28. Palpebral ossifications. Ossifications in orbit restricted to sclerotic ring (0), or numerous additional ossicles at medial margin of sclerotic ring (1).
29. Pineal foramen. Present (0), or absent in adults (1).
30. Interorbital distance. Narrower than or equalling orbital width (0), or wider (1).
31. Frontal-nasal (length). Frontal as long or longer than nasal (0), or shorter (1).
32. Frontal-nasal (suture). Level with or anterior to the orbit margin (0), or further posterior (1).

33. Lateral line sulci (adults). Present (0), absent (1).
34. Sulci (skull roof). Throughout skull roof if present (0), or confined to circumorbital region (1).
35. Infraorbital sulcus. With simple curve on lacrimal (0), or with pronounced S-shaped lacrimal flexure (1).
36. Supraorbital sulcus. Passing entirely through nasal (0), or entering prefrontal and lacrimal (1).
37. Maxilla (anterior margin). Straight (0), or laterally convex due to enlarged teeth (1).
38. Maxilla (contact to nasal). Absent, separated by lacrimal (0), or present (1).
39. Prefrontal-frontal. Prefrontal substantially longer than frontal (0), or ending at one level with frontal (1).
40. Prefrontal (anterior end). Pointed (0), or wide and blunt (1).
41. Prefrontal (lateral suture). Straight or concave (0), or with marked medial projection of jugal near the orbit (1).
42. Prefrontal-postfrontal. Sutured (0), or separated by frontal (1).
43. Prefrontal (process). Prefrontal-lacrimal suture simple (0), or prefrontal underlying lacrimal laterally to reach the palatine (1).
44. Prefrontal-jugal. Separated by lacrimal (0), or in contact (1).
45. Prefrontal-maxilla. Separated by lacrimal (0), or in contact (1).
46. Posterior skull table (length). More than 0.6 times the width (0), or less than that (1).
47. Postorbital (shape). Long triangular, wedged deeply between squamosal and supratemporal (0), or short (1).
48. Postorbital (end). Posterior end acutely triangular (0), or with finger-like projection (1).
49. Postorbital. Not wider than orbit (0), or with substantial lateral process projecting into jugal (1).
50. Postorbital, postfrontal. Shorter than supratemporal and parietal (0), or as long or longer (1).
51. Otic notch. Semicircular embayment between squamosal and posterior skull table (0), or straight transverse posterior skull margin without embayment between cheek and table (1).
52. Otic notch (position). Lateral, expanding along entire cheek to form continuous unornamented area up to quadrate (0), or slit-like (1), or small and rounded, confined to dorsomedial part of squamosal (2).
53. Supratemporal. Longer than wide (0), or quadrangular, giving a foreshortened posterior skull table (1).
54. Supratemporal (width). Rectangular, with straight sagittal lateral margin (0), or posterolaterally constricted by expanded otic notch (1).
55. Supratympanic flange. Squamosal continuously ornamented around margin of otic notch (0), or squamosal having dorsally exposed and ornamented area (supratympanic flange) stepping abruptly into steeply aligned, poorly ornamented portion (1).
56. Semilunar flange. Supratemporal without ventral projection into otic notch (0), or supratemporal forming marked ventral flange participating in medial bordering of otic notch (1).
57. Jugal (ventral process). No ventral outgrowth (0), or insula jugalis framing subtemporal window (1).

58. Jugal (anterior extension). Jugal ending at or behind level of anterior orbit margin (0), or extending anteriorly (1).
59. Jugal-lacrimal. In contact (0), or separated by orbit or palate bones (1).
60. Intertemporal. Present (0), absent (1).
61. Intertemporal and postorbital. Postorbital lateral to postfrontal (0), or expanding medially to replace intertemporal, contacting parietal (1).
62. Squamosal-tabular (dorsal). Separated by supratemporal (0), or sutured (1).
63. Tabular and squamosal. Forming either squamosal embayment or straight posterior margin (0), or projecting posteriorly, with tabular extended posterolaterally (1).
64. Squamosal (falciform crest). Posterior rim of squamosal straight (0), or with convex projection, referred to as falciform crest (1).
65. Tabular (horn). Present in some form (0), or entirely absent (1).
66. Tabular (extension). Tabular horn pointing posteriorly if present (0), or aligned laterally (1), or sutured with squamosal posterior to otic notch (cyclotosaur condition) (2).
67. Tabular (ventral crest). Absent (0), or present and shallow (1), or forming a deep ridge that almost doubles the thickness of the tabular in occipital view (2). These character-states were ordered.
68. Quadratojugal (medial process). Absent (0), or present (1).
69. Quadratojugal-maxilla. In contact (0), or separated by jugal (1).
70. Quadrate (dorsal process). Absent (0), or present (1).
71. Posterior skull rim. Quadrate trochlea posterior to tabular horns (0), or at one level or anterior (1).
72. Occipital flange. Descending flange of occipital portion of postparietals forming a bulge (0), or long smooth blades as long as the dermal portion of the postparietal (1).
73. Postparietal-exoccipital. No contact (0), or pillar-like dorsal process of exoccipital firmly sutured to ventral side of postparietal and oblique process of exoccipital sutured with ventral ramus of tabular (1).
74. Postfenestral window. Large opening, having at least double the width of the foramen magnum (0), or reduced to a tiny foramen (1).
75. Quadrate and occipital condyles. Quadrate condyles posterior to occipital ones (0), or at same level (1), or well anterior (2).
76. Epipterygoid. Simple rod-like ascending process (0), or complicated and robust element with up to six processes (1).

### **Dental characters (from Schoch, 2013)**

77. Dentition (marginal). Heterogenous, varying sizes and distances (0), or homogeneous, small teeth, equidistant (1).
78. Dentition (upper jaw). Conical to slightly curved inwards (0), or caniniform (1).
79. Dentition (marginal, tooth bases). Round or oval (0), or forming transversely broadened ovals (1).
80. Palatal tusks (cross-section). Round or oval (0), or laterally compressed and keeled at least on one side (1).
81. Dentition (vomer). Tooth patches present at least in small specimens (0), or dentition entirely restricted to vomerine fangs (1).
82. Pedicely. All teeth formed consisting of a single mineralized conus (0), or at least some teeth with two separate mineralization centres (pedicellate) (1).

83. Bicuspidity. All teeth with single tip (0), or at least some with bicuspid crowns (1).
84. Labyrinthodonty. Teeth with labyrinth infolding of dentine and enamel at base (0), or never labyrinthodont (1).
85. Transverse tooth row (transvomerine). Absent (0), present and transverse (1), V-shaped (2).
86. Additional vomerine fangs. Vomer with a single pair of fangs at the medial margin of choana (0), or with additional fangs/fang pairs posteromedially (1).
87. Parasphenoid (shagreen). Tooth patches present (0), or teeth entirely absent (1).
88. Ectopterygoid (fangs). Present (0), or absent (1).

**Palatal and braincase characters (from Schoch, 2013)**

89. Interpterygoid vacuities. Slender and slit-like (0), or rounded, oval openings (1).
90. Interpterygoid vacuities, pterygoid. Vacuities rounded bordered by moderately concave pterygoid (0), or laterally greatly extended at mid-level pushing pterygoid to the margin (1).
91. Anterior palatal opening(s). Vomer and premaxilla with continuous suture (0), or perforated to accommodate symphyseal fangs (1).
92. Anterior palatal opening(s). Unpaired if present (0), or paired (1).
93. Vomer. Narrow and small (0), or large plate, widely separating choanae (1).
94. Vomer (paired anterior depressions). Absent (0), or present (1).
95. Anterior palatal depression. Posterior rim round if present (0), or straight transverse (1).
96. Vomerine ridges. Absent (0), or present, radiating from vomerine tusks anteriorly (1).
97. Vomerine pit and fontanelle. Absent (0), or pit present (posterior to mandible) (1), or fenestra within such pit (2).
98. Vomerine septum. Absent (0), or present (1).
99. Choana (lateral). Anterolaterally expanded with triangular outline (0), or oval (1).
100. Choana (medial). Medial margin straight or gently convex (0), or anteromedially expanded giving choana a reniform outline (1).
101. Choana (width). Elongated oval to slit-like (0), or wide round (1).
102. Vomer-ptyergoid. Sutured (0), or separated by palatine (1).
103. Vomer (anterior part). Anterior portion shorter than behind anterior level of choana (0), or as long or longer (1).
104. Vomer (extension). Vomer contacts pterygoid lateral to choana (0), or expanding posteriorly (1).
105. Basipterygoid ramus. Pterygoid with short, posteromedially curved basipterygoid process, constricting palatal vacuities posterolaterally (0), or with transversely extended process producing posteriorly wider vacuities (1).
106. Basicranium (contact). Joint between basal plate and pterygoid (0), or sutural contact (1).
107. Basicranium, suture. Suture (if present) much shorter than basal plate, reaching at best 40% its length (0), or suture almost as long as basal plate (1).
108. Parasphenoid. Suturing with exoccipitals (0), or underplating exoccipitals (1).
109. Basicranium (carotids). Internal carotids entered basicranium ventrally near base of cultriform process (0), or at posterolateral corner of bone (1).
110. Parasphenoid plate. Basal plate sagittally rectangular (0), or quadrangular to wider than long (1), or much abbreviated, transversely rectangular (2).

111. Parasphenoid plate (size). Basal plate at level posterior to basicranial joint substantially narrower than parietals (0), or as wide or wider (1).
112. Cultriform process (width). Base not wider than rest, clearly set off from basal plate (0), or merging continuously into plate (1).
113. Cultriform process (structure). Ventrally flat (0), or with ridge emplaced on broader base (1), or knife-edged and keel-shaped (2).
114. Cultriform process (outline). Of similar width throughout (0), or posteriorly expanding abruptly to about twice the width (1).
115. Cultriform process (dentition). Main shaft edentulous except for base (0), or with elongate tooth patch (1).
116. Parasphenoid (posterolateral process). Posterolateral margin straight (0), or with lateral wing (1).
117. Pterygoid (ventral ornament). Palatine ramus of pterygoid smooth (0), or ornamented with reticulate ridges (1).
118. Pterygoid, exoccipital. No contact (0), or sutured lateral to parasphenoid (1).
119. Pterygoid, basioccipital. No contact (0), or sutured lateral to parasphenoid (1).
120. Pterygoid, squamosal. Entirely sutured (0), or with open fissure (1).
121. Pterygoid (flange). Palatine ramus of pterygoid merging continuously into basiptyergoid ramus (0), or broadening abruptly to form transverse flange (1).
122. Pterygoid width. Palatine and quadrate regions forming slender rami (0), or broad shelves (1).
123. Pterygoid, ectopterygoid. Palatine ramus exclusively formed by pterygoid (0), or with posteromedial projection of ectopterygoid.
124. Pterygoid-palatine-ectopterygoid. Pterygoid contacting both ectopterygoid and palatine (0), or pterygoid only in contact with ectopterygoid (1).
125. Palatine, ectopterygoid. With simple, transverse suture (0), or palatine with posterolateral process excluding the ectopterygoid from interptyergoid vacuity and contacting pterygoid (1).
126. Palatine, vomer. Suture aligned posterolaterally (0), or with medial wing framing the interptyergoid vacuity anteriorly (1).
127. Palatine (laterally exposed palatine, LEP). Absent (0), or present (1).
128. Palatine, ectopterygoid (ontogeny). Maintain their width (0), or become proportionally wider (1).
129. Palatine, ectopterygoid (width). Much wider than maxilla (0), or as narrow (1).
130. Palatine, ectopterygoid (continuous tooth row). Absent (0), or present (1).
131. Ectopterygoid (length). As long or longer than palatine (0), or markedly shorter (1).
132. Ectopterygoid (laterally exposed ectopterygoid, LEE). Absent (0), or present (1).
133. Ectopterygoid (Y-shaped). Ectopterygoid with continuous maxillary suture (0), or Y-shaped, with posterior half separated from maxilla by a gap (1).
134. Palate structure. In occipital view, pterygoids either sloping continuously ventrolaterally or flat horizontal (0), or vertically curved ventrally at right angle with basicranium (1).
135. Quadrate trochlea. Medial bulge only slightly larger than lateral one (0), or being at least two times longer and twice as wide (1).
136. Occipital condyle. Trilobed, with basioccipital forming ventral part of facet (0), or bilobed exoccipital condyle with reduced basioccipital contribution (1).

- 137. Exoccipital condyles. Short and broad base, projecting only with their posterior half behind the rim of the skull table (0), or almost the complete element posterior to level of occipital flange (1).
- 138. Basioccipital (length). Forming a long element posterior to parasphenoid plate (0), or foreshortened to a narrow posterior rim of the palatal bone (1).
- 139. Dentigerous palatal ossicles. Absent (0), or present within interpterygoid vacuities (1).

**Mandibular characters (from Schoch, 2013)**

- 140. Postglenoid area. Absent or present as very faint outgrowth (0), or longer than glenoid facet (1).
- 141. Postglenoid area (types). Type 1 (0), or type 2 (1).
- 142. Postglenoid area (dorsal). Plain (0), or with elongated groove (1).
- 143. Hamate process. Absent (0), or present but lower than postglenoid portion is long (1), or as high as retroarticular process (2).
- 144. Preglenoid process. Labial side of surangular with straight dorsal margin anterior to glenoid (0), or forming dorsal projection well above the level of the glenoid articulation (1).
- 145. Meckelian window. Small round or oval opening (0), or elongate window shorter than the adductor fossa (1), or as long or longer than adductor fossa (2).
- 146. Symphyseal teeth. No accessory teeth posterior to symphyseal tusks (0), or a transverse row of such teeth (1).
- 147. Posterior coronoid teeth. Present (0), or absent (1).
- 148. Anterior, middle coronoid teeth. Present (0), or absent (1).
- 149. Mandibular osteoderms. Throat region naked (0), or covered with a mosaic of ventral osteoderms between mandible and dermal pectoral girdle (1).

**Splanchnocranium and suspensorium characters (from Schoch, 2013)**

- 150. Stapes (quadrate process). Absent (0), or present (1).
- 151. Stapes (ventral process). Absent (0), or present, giving the proximal region two heads (1).
- 152. Stapes (shape). Robust, tetrahedral bone with substantial quadrate process (0), or rod-like element with elongated stylus (1), or blade-like (2).
- 153. Stapes (curvature). Stapes with pronounced dorsodistal curvature (0), or abbreviated without such curvature, directed laterally towards vertically aligned otic notch (1).
- 154. Ceratobranchials. Bony elements absent (0), present in adults (1).
- 155. Basibranchial. Bony element absent (0), present in adults (1).
- 156. Hypobranchial elements. Bony elements absent (0), present in adults (1).
- 157. Branchial denticles. Conical and attached to small ossicles in groups of 2–10 (0), or free and with brush-like end (1).

**Postcranial characters (from Schoch, 2013)**

- 158. Presacral count. More than 28 (0), or 23–25 vertebrae (1), or less than 21 (2).
- 159. Caudal count. Similar to presacral count or higher (0), or much lower (1).
- 160. Transverse process (orientation). Short, directed posteriorly (0), or distally extended with diapophysis pointing laterally (1).
- 161. Transverse process (length). Shorter than dorsal spine is high (0), or markedly longer (1).
- 162. Neural spine (height). As high as distance between zygapophyses (0), or higher (1).

163. Intercentrum (shape). Presacral intercentra form simple wedges (0); or dorsally closed discs (1); or dorsally closed and elongated cylinders (2).
164. Intercentrum (width). Chordal canal wider than intercentrum high (0), narrower (1).
165. Intercentrum (ventral surface). Ventral surface shorter than wide in ventral view, giving transversely rectangular outline (0), or as long as wide, quadrangular (1).
166. Intercentrum anterior surface. Always concave (0), or convex at least in some presacral centra (1).
167. Parapophysis. Segmental (0), or intersegmental (1).
168. Pleurocentrum (presence). Ossified (0), unossified (1).
169. Pleurocentrum (lateral surface). As large as that of intercentrum (0), or smaller (1).
170. Pleurocentrum (ventral extension). Wedged between successive intercentra and not reaching ventral margin of intercentra (0), or pleurocentra ventrally expanded to near each other (1), or ventrally fused to form a single cylindrical element (2).
171. Ribs (length). Moderately elongate thoracic ribs curved distoventrally (0), or such ribs foreshortened without distal curvature (1).
172. Ribs (ventral extension). Rib heads (tuberculum and capitulum) confluent (0), or clearly set off and widely separated in mid-trunk region (1).
173. Ribs (uncinate blades). If present, small and spine-like (0), or extensive and blade-like (1).
174. Ribs (uncinate spines). Short (0), or elongated, as long as shaft (1).
175. Cleithrum. With broadened dorsal head region (0), or a simple rod (1).
176. Cleithrum. Head with slightly convex or straight anterior rim (0), or with pronounced anterior projection (1).
177. Cleithrum. Dorsal head region confined to anterior rim of scapula (0), or posteriorly extended to cover dorsal rim of scapula (1).
178. Clavicle (ventral blade). Wide, triangular, overlapping interclavicle broadly (0), or slender, with minor overlap (0).
179. Interclavicle (length). Shorter than posterior skull (0), or substantially longer (1).
180. Interclavicle (ontogeny). Without major proportional change in ontogeny (0), or decreasing proportionally relative to skull length (1).
181. Interclavicle (central ornamented area). Rhomboidal (0), or pentagonal and posteriorly widest (1).
182. Interclavicle (proportions). As long as wide (0), or 1.3 times as long as wide (1), or more than twice as long as wide (2).
183. Interclavicle (posterior margin). With posterior process (0), or transversely straight (1).
184. Interclavicle (anterior margin). Serrated (0), or smooth (1).
185. Interclavicle (anterior stylus). Anterior portion of interclavicle variably shaped but not longer than posterior one, as measured by the centre of ornamentation (0), or substantially longer than posterior one (1).
186. Interclavicle (posterior stylus). Posterior end rounded or blunt (0), or with elongated stylus or parasternal process (1).
187. Interclavicle, clavicles. Clavicles broadly separated by interclavicle ventrally (0), or leaving only narrow strip of interclavicle in between (1), or in contact and excluding anterior part of interclavicle from ventral exposure (2).
188. Scapula (glenoid facet). Ossified (0), or unossified in adults (1).

189. Scapula (height). Maximally two times longer (higher) than wide (0), or dorsally extended and fully ossified, three times higher than wide (1).
190. Humerus (ontogeny). Short cylinder in larvae, elongates at slow rate (0), or with substantial shaft in larvae (1), or very long rod from small stages on (2).
191. Humerus (adult shaft). No shaft proper, humerus blade-like in cross-section (0), or with short shaft oval in cross-section (1), or shaft elongate and slender, comprising more than 50% of the humerus with rounded cross-section (2).
192. Humerus (entepicondylar foramen). Present (0), or absent (1).
193. Humerus (supinator). Present (0), or absent (1).
194. Humerus (condyles). Distal end at least partially ossified with identifiable condyles (0), or unfinished without condyles (1), or with fully established condyles (2).
195. Humerus (torsion). Strong, 70-90° (0), or weak, well below 60° (1).
196. Carpals. All unossified (0), or all at least some ossified (1).
197. Manual digit count. Five (0), or four (1).
198. Ilium (shaft). Shaft of variable length but laterally flattened (0), or very long and slender (1).
199. Ilium (dorsal end). Tip of dorsal end continuous (0), or much broadened (1).
200. Ilium (height). Shaft more than twice the length of the base (0), or shorter (1).
201. Ilium (orientation). Main axis of shaft inclined posterodorsally (0), or vertical (1).
202. Ilium (tip). Dorsal end two-headed (0), or single-headed (1).
203. Pubis. Unossified (0), or ossified (1).
204. Femur. Intercondylar fossa forming deep and elongated trough (0), or reduced to short depression (1).
205. Femur (trochanter). Internal trochanter present as discrete process (0), or reduced to a shallow crest (1), or greatly enlarged to form a massive projection (2).
206. Tarsals. At least some are ossified (0), or all unossified (1).
207. Gastral squamation. Ossified ventral dermal scales (0), or scales absent (1).
208. Squamation. Dermal scales oval to spindle-shaped (0), or broad-oval with “microsaur-type” ornament (1).
209. Osteoderms. Absent (0), or present as single row (1), or more numerous to form a carapace (2).
210. Osteoderms (articulations). Simple set of osteoderms arranged in one layer if present (0), or double set of two layers, the ventral one fused to the tip of the neural arch (1).
211. Osteoderms (width). An intra-dissorophid character: Narrow median osteoderms (0), or transversely extended plates (1).
212. Rib cage. Trunk narrower than skull or as wide (0), or trunk substantially wider than lateral margin of cheeks at about mid-level (1).

**Characters sampled from Anderson et al. (2008) A1–A217**

213. [A1.] Basal skull length. >70mm (0), 50-70mm (1), 30-50mm (2), <30mm (3).
214. [A2.] Skull to trunk.  $\geq 0.45$  (0), 0.30-0.45 (1), 0.20-0.29 (2), 0.20 (3).
215. [A3.] Skull proportions. Longer than wide (0), wider than long (1).
216. [A5.] Supratemporal. Present (0), absent (1).
217. [A6.] Supratemporal exposure on occiput. Absent (0), present (1).
218. [A9.] Postfrontal shape. Broadly quadrangular (0), falciform (1).
219. [A14.] Lacrimal-naris contact. Present (0), absent (1).



220. [A15.] Lacrimal contribution to orbit. Absent (0), present (1).
221. [A16.] Lacrimal orbital processes. Only ventral present (0), dorsal and ventral present (1), neither present (2).
222. [A18.] Quadratojugal. Present (0), absent (1).
223. [A21.] Frontals. Paired along midline (0), fused (1).
224. [A22.] Frontal contribution to orbit. No (0), yes (1).
225. [A28.] Septomaxilla. Ossified (0), unossified (1).
226. [A29.] Prefrontal contributes to external naris. Distant from (0), near (1), present (2).
227. [A30.] External naris in dorsal view. Exposed (0), not exposed (1).
228. [A34.] Posterior skull margin. Concave (0), straight (1), convex (2), undulating (3).
229. [A39.] Large otic notch approaching orbit. Absent (0), intermediate (1), close (2).
230. [A45.] Postorbital. Present (0), absent (1).
231. [A48.] Shape of postorbital. Irregular trapezoid (0), triangular, apex caudal (1).
232. [A50.] Parietal-postorbital contact. Absent (0), present (1).
233. [A51.] Parietal-squamosal contact. Absent (0), present (1).
234. [A52.] Parietal-tabular contact. Absent (0), present (1).
235. [A53.] Postparietals. Paired (0), fused (1), absent (2).
236. [A56.] Postparietal-squamosal contact. Absent (0), present (1).
237. [A57.] Postparietal length. Large, quadrangular (0), abbreviated anteroposteriorly, elongate lateral rectangle (1).
238. [A58.] Squamosal-jugal contact. Present (0), absent (1).
239. [A59.] Tabular. Present (0), absent (1).
240. [A68.] Maxilla into external naris. Present (0), absent (1).
241. [A69.] Maxilla forms entire ventral naris. Absent (0), present (1).
242. [A74.] Number of premax teeth.  $\geq 10$  (0), 5-9 (1),  $< 5$  (2).
243. [A75.] Number of max teeth.  $\geq 30$  (0), 20-29 (1),  $< 20$  (2).
244. [A76.] Teeth laterally compressed. No (0), yes (1).
245. [A82.] Occipital profile. Low and wide (0), high and wide (1), high and narrow (2).
246. [A83.] Supraoccipital. Absent (0), present (1).
247. [A86.] Jugular foramen. Between opisthotic and exoccipital (0), through exoccipital (1).
248. [A92.] Anterior palatine. Short anteromedial process articulating with vomer at choana (0), long anteromedial process, more medial than lateral (1), palatine absent (2).
249. [A97.] Denticles on pterygoid. Present (0), absent (1).
250. [A98.] Teeth on pterygoid. Absent (0), present (1).
251. [A100.] Denticles on vomers. Present (0), absent (1).
252. [A101.] Denticles on palatines. Present (0), absent (1).
253. [A102.] Denticles on parasphenoid. Present (0), absent (1).
254. [A106.] Cultriform process contact with vomer. Narrow (0), broad (1).
255. [A108.] Stapes. Perforated columella (0), imperforate columella (1), no columella (2).
256. [A113.] Pleurospenoid. Unossified (0), ossified (1).
257. [A114.] Sphenethmoid. Ossified (0), unossified (1).
258. [A116.] Pterygoids contact anteriorly. Present (0), absent (1).
259. [A120.] Lateral process of pterygoid contribution to posttemporal fossa. Absent (0), present (1).
260. [A124.] Dentary. Long (0), short (1).
261. [A125.] Dentary forms coronoid process. Absent (0), present (1).

262. [A126.] Surangular. Normal (0), reduced (1), absent (2).
263. [A127.] Angular. Narrow (0), deep (1).
264. [A128.] Number of splenials. 2 (0), 1 (1), 0 (2).
265. [A129.] Splenial exposed laterally. Present (0), absent (1).
266. [A130.] Meckelian fossae. 2 or more (0), 1 (1), 0 (2).
267. [A131.] Ventral border of Meckel's fossa. Splenial (0), angular (1).
268. [A133.] Retroarticular process. Straight (0), hooked (1).
269. [A134.] Articulation to tooth row. Above (0), equal (1), below (2).
270. [A135.] Angular extends to (lat view). Posterior tooth row (0), middle of tooth row (1).
271. [A136.] Number of coronoids. 3 (0), 2 (1), 1 (2), 0 (3).
272. [A137.] Coronoid teeth. Present (0), absent (1).
273. [A138.] Coronoid teeth. Larger than marginal (0), equal to marginal (1), smaller than marginal (2).
274. [A139.] Symphysis. Dentary and splenial (0), dentary alone (1).
275. [A140.] Jaw sculpture. Present (0), absent (1).
276. [A141.] Ossified hyoids. Present (0), absent (1).
277. [A143.] Parahyoid. Absent (0), present (1).
278. [A148.] Trunk intercentra. Present (0), absent (1).
279. [A149.] Trunk neural arch to centrum. Loosely articulated (0), sutured (1), fused (2).
280. [A150.] Base of neural spine. Equal to or wider than haemal (0), smaller than haemal spine (1).
281. [A156.] Haemal arches. Present (0), absent (1).
282. [A157.] Haemal arches. Loosely articulated intercentrum (0), fused to mid-length of centrum (1).
283. [A158.] Haemal arches. Longer than or equal to neurals (0), shorter than neurals (1).
284. [A160.] Haemal arch shape. Non-parallel (triangular) (0), parallel (rectangular) (1).
285. [A164.] Spinal nerve foramina. Absent (0), present (1).
286. [A166.] Transverse process. On arch pedicle (0), on centrum (1).
287. [A167.] Atlas-axis intercentra. Present (0), absent (1).
288. [A168.] Atlas anterior centrum. Same size as posterior (0), laterally expanded (1).
289. [A169.] Atlas centrum. Multipartite (0), single notochordal (1), single odontoid (2).
290. [A170.] Atlas neural arch. Loosely articulated (0), sutured to centrum (1), fused to centrum (2).
291. [A171.] Atlas parapophyses. On centrum (0), on transverse process (1), absent (2).
292. [A172.] Atlas neural arch. Paired (0), sutured at midline (1), fused at midline (2).
293. [A174.] Proatlantes. Present (0), absent (1).
294. [A175.] Second cervical arch. Expanded to more posterior (0), equal to more posterior (1), shorter than more posterior (2).
295. [A177.] Cervical rib distal shape. Spatulate (0), pointed (1).
296. [A178.] Ribs anterior to sacrum. Short (0), long (1).
297. [A182.] Sacral parapophysis. On centrum (0), on transverse process (1).
298. [A183.] Number pairs of caudal ribs. 5 or more (0), 4 (1), 3 (2), 2 or fewer (3).
299. [A196.] Supraglenoid foramen. Present (0), absent (1).
300. [A197.] Number coracoid foramina. 0 (0), 1 (1), 2 (2).
301. [A198.] Scapulocoracoid ossification. Both (0), scapula only (1), absent (2).
302. [A201.] Deltpectoral crest. Weak (0), intermediate (1), prominent (2).

- 303. [A203.] Humerus length. Long (>4 trunk centra) (0), short (1).
- 304. [A204.] Radius:humerus.  $\geq 0.7$  (0), 0.5-0.7 (1), <0.5 (2).
- 305. [A205.] Olecranon process. Unossified (0), ossified (1).
- 306. [A207.] Basale commune. Absent (0), present (1).
- 307. [A214.] Femur. Long (0), short (1).
- 308. [A216.] Elongate tibiae and fibulae. Absent (0), present (1).
- 309. [A217.] Number of distal tarsals. 6 (0), 5 or fewer (1).

**Characters sampled from Huttenlocker et al. (2013) H220–H227**

- 310. [H220.] Dorsal margin of splenial only contacts first coronoid. Absent (0), present (1).
- 311. [H226.] Parietal anterior waisting. Absent (0), present (1).
- 312. [H227.] Parietal width relative to frontal. Greater (0), less than or equal to (1).

**Characters sampled from Maddin et al. (2012a,b) M1–M112, N1–5**

- 313. [N2.] Skull table. Rectangular (0), T-shaped (1).
- 314. [M6.] Prefrontals. Present (0), absent (1).
- 315. [M7.] Postfrontals. Present (0), absent (1).
- 316. [M8.] Squamosal-frontal contact. Contact (0), no contact (1).
- 317. [M10.] Zygokrotaphy. Stegokrotaphy including roofing bones like tabulars and supratemporals (0), zygokrotaphy with muscles approaching skull midline (1), stegokrotaphy in the absence of roofing bones such as tabulars and supratemporals (2), zygokrotaphy, but muscle does not extend through temporal fossa (3).
- 318. [M13.] Quadrate-maxilla separated by. Pterygoid (0), small pterygoid and pterygoid process of quadrate (1), by pterygoid process of quadrate only (pterygoid absent) (2).
- 319. [M17.] Quadrate-maxillopalatine. contact laterally (0), do not contact laterally (1).
- 320. [M20.] Ceratobranchials. 3 and 4 fused enclosing larynx (0), not (1).
- 321. [M26.] Tentacle. Absent (state added here) (0), present adjacent to eye (1), between eye and naris (2), beneath naris (3).
- 322. [M29.] Splenial teeth. Present (0), absent (1).
- 323. [M30.] Choanal openings. Small (0), large (1).
- 324. [M32.] Sphenethmoid. Covered dorsally (0), exposed dorsally (1).
- 325. [M37.] Larval stage. Present (0), absent, direct development (1).
- 326. [M51.] Anterior dentary teeth. Bicuspid (0), monocuspid (1).
- 327. [M79.] Nasal septum ossification. Not ossified (0), 20-35% of the total skull length (1), less than 20% of the total skull length (2).
- 328. [M81.] Dorsomedial process of the sphenethmoid. Absent (0), 11% or more of the total skull length (1), 10% or less of the total skull length (2).
- 329. [M82.] Dorsomedial process of the sphenethmoid. Thin and rod-like (0), thick and broad (1).
- 330. [M83.] Dorsal sutural surface of the sphenethmoid. Narrow or weakly tapered (0), broad and triangular and strongly tapered (1).
- 331. [M84.] Sola nasi. Absent (0), present and connected to the nasal septum ventrally (1), present, rod-like or tubular (2).
- 332. [M85.] Length of the lateral walls of the sphenethmoid. 14% or less than the total skull length (0), 15% or greater of the total skull length (1).

333. [M86.] Floor of sphenethmoid. Deeply incised and U-shaped in outline (0), shallowly incised with broad coverage of os basale (1), deeply incised and U-shaped, but with midline extension (2).
334. [M94.] Parasphenoid margins (definition changed here). Absence of lateral constriction posterior to basicranial articulations (0), weak constriction posterior to basicranial articulations present (1), strong constriction posterior to basicranial articulations, reaching to the carotid foramina (2).
335. [M97.] Skull roof exposure of the os basale. Moderate exposure at the dorsal midline (0), little to no exposure near the dorsal midline (1), very wide exposure near the dorsal midline (2).
336. [M100.] Fenestra vestibuli. Large, subcircular (0), anteroposteriorly elongate, oval (1), very small, subcircular (2).
337. [M105.] Canal for palatal ramus of the facial nerve in antotic region. Absent (0), present (1).
338. [M107.] Footplate of stapes. Fills the fenestra vestibule (0), much smaller than the fenestra vestibule (1).
339. [M111.] Columellar process. No ridge present (0), ridge on distal columellar process (1).
340. [M112.] Shape of optic foramen. Large, subcircular opening (0), narrow and slit-like opening (1), oblique anterior margin in the sphenethmoid (2), oblique posterior margin in the os basale (3).
341. [N4.] Anterior wall of sphenethmoid. Unossified (0), ossified, one pair of foramina (1), ossified, two pairs of foramina (dorsal and ventral) (2).
342. [N5.] Anterolateral process of sphenethmoid. Absent (0), present (1).

#### **New characters N6–8**

343. [N6.] Parasphenoid cultriform process. Narrow, tapering anteriorly (0), spatulate and parallel-sided (1).
344. [N7.] Dentary marginal dentition. Single row (0), multiple rows (1).
345. [N8.] Dorsolateral osteoderms fused to ribs. Absent (0), present (1).

#### **Part D. NEXUS Scripts**

#NEXUS

[written Wed Apr 19 09:29:25 PDT 2017 by Mesquite version 3.10 (build 765) at usc-secure-wireless-013-081.usc.edu/68.181.13.81]

BEGIN TAXA;

DIMENSIONS NTAX=76;

TAXLABELS

Proterogryinus\_scheelei Greererpeton\_burkemorani Edops\_craigi  
 Adamanterpeton\_ohioensis Cochleosaurus\_bohemicus Nigerpeton\_ricqlesi  
 Chenoprosopus\_milleri Dendrerpeton\_acadianum Balanerpeton\_woodi  
 Trimerorhachis\_insignis Neldasaurus\_wrightae Isodectes\_obtusus  
 Acroploous\_vorax Capetus\_palustris Iberospondylus\_schultzei  
 Acanthostomatops\_vorax Zatrachys\_serratus Micromelerpeton\_credneri  
 Limnogyrinus\_elegans Apateon\_pedestris Micropholis\_stowi  
 Platyrrhinops\_lyelli Amphibamus\_grandiceps Doleserpeton\_annectens  
 Gerobatrachus\_hottoni Dissorophus\_multicinctus

Cacops\_aspidephorus\_morrisi Broiliellus\_texensis Acheloma\_cumminsi  
 Phonerpeton\_pricei Ecolsonia\_cutlerensis Onchiodon\_labyrinthicus  
 Eryops\_megacephalus Sclerocephalus\_haeuseri Glanochthon\_latirostris  
 Archegosaurus\_decheni Platyoposaurus\_stuckenbergi  
 Australerpeton\_cosgriffi Lapillopsis\_nana Peltobatrachus\_pustulatus  
 Rhineceps\_nyasaensis Uranocentrodon\_senekalensis  
 Broomistega\_putterilla Lydekkerina\_huxleyi Chomatobatrachus\_halei  
 Sangaia\_lavina Peltostega\_erici Laidleria\_gracilis Siderops\_kehli  
 Batrachosuchus\_watsoni Plagiosuchus\_pustuliferus  
 Gerrothorax\_pulcherrimus Edingerella\_madagascariensis  
 Benthosuchus\_sushkini Trematosaurus\_brauni Trematolestes\_hagdorni  
 Lyrocephaliscus\_euri Callistomordax\_kugleri  
 Metoposaurus\_diagnosticus Parotosuchus Paracyclotosaurus\_davidi  
 Cyclotosaurus\_robustus Mastodonsaurus\_giganteus  
 Rileymillerus\_cosgriffi Chinlestegophis\_jenkinsi  
 Eocaecilia\_micropodia Triadobatrachus\_massinoti Karaurus\_sharovi  
 Kokartus\_honorarius Cryptobranchus\_alleghehniensis Hynobius\_japonicus  
 Ambystoma\_opacum Xenopus\_tropicalis Epicrionops\_bicolor  
 Ichthyophis\_bannannicus Leptodactylus\_mystacinus  
 ;

END;

BEGIN CHARACTERS;

TITLE Character\_Matrix;

DIMENSIONS NCHAR=345;

FORMAT DATATYPE = STANDARD GAP = - MISSING = ? SYMBOLS = " 0 1 2  
3";

CHARSTATELABELS

1 'Skull (outline)' / Parabolic Triangular\_with\_pointed\_tip,  
 2 'Skull (Height)' / 'Skull of variable height, but occiput always deeper  
 than snout' extremely\_flattened\_to\_equal\_height\_throughout, 3 'Ornament  
 (elements)' / Reticulate\_ridges\_of\_various\_sizes isolated\_pustules  
 absent, 4 'Ornament (snout)' / Polygons\_or\_short\_grooves 'mostly radial,  
 elongated grooves', 5 'Ornament (general)' /  
 Shallow\_ridges\_of\_variable\_height high\_ridges\_throughout, 6 'Ornament  
 (intensive growth)' / 'Elongated ridges ('zones of intensive growth')  
 confined to snout only'  
 prepineal\_growth\_zone\_established\_on\_extended\_anterior\_parietal\_and\_postor  
 bital, 7 'Ornament (preorbital)' /  
 Zone\_of\_subdued\_ornament\_on\_medial\_skull\_bones\_adjacent\_to\_midline\_suture\_  
 absent present, 8 Spines / absent  
 present\_along\_lateral\_flank\_of\_quadratejugal, 9 'Preorbital region  
 (length)' / Less\_than\_twice\_the\_length\_of\_posterior\_skull\_table more  
 equal\_in\_length, 10 'Premaxilla (alary process)' / absent 'present,  
 forming a posterior hook-like indentation', 11 'Premaxilla (prenarial  
 portion)' / short 'very expanded, equalling the length of the frontal',  
 12 'Premaxilla (outline)' / parabolically\_rounded 'box-like and  
 anteriorly blunt', 13 Premaxillary\_foramen /  
 Premaxilla\_and\_nasal\_completely\_sutured  
 medially\_bearing\_an\_opening\_separating\_the\_two\_alary\_processes\_of\_the\_prem  
 axilla, 14 Premaxillary\_fontanelle /  
 Premaxillae\_with\_or\_without\_a\_small\_opening  
 encircling\_large\_fenestra\_extending\_posteriorly\_between\_the\_nasals, 15  
 'Snout (internarial distance)' / Narrower\_than\_interorbital\_distance

wider, 16 'Nasal (width)' / Nasal\_longer\_than\_wide as\_wide\_as\_long, 17  
'Naris (position)' / 'At lateral margin of snout, opening laterally' 'set  
well medially, opening anteriorly', 18 'Naris (extension)' / 'Naris  
uniform, with oval shaped margin' 'posteriorly expanded with distinct  
anterior and posterior regions giving external overall "keyhole" shape',  
19 'Naris (flange)' / 'Ventral (inner) side of prefrontal, lacrimal, and  
nasal smooth' 'bearing a complicated bar-like structure (narial flange)  
permitting contact with antorbital bar', 20 'Nasal (lateral margin)' /  
straight 'stepped, with lateral excursion anterior to lacrimal', 21  
Lacrimal / present absent, 22 'Lacrimal (lateral suture)' /  
Parallels\_medial\_suture  
lateral\_suture\_posterolaterally\_expanded\_to\_give\_broader\_preorbital\_region  
, 23 'Lacrimal (position)' / Extending\_anterior\_to\_orbit  
Confined\_to\_lateral\_orbital\_margin, 24 'Lacrimal (posterior extension)' /  
Restricted\_to\_the\_antorbital\_region Extending\_back\_lateral\_to\_orbit, 25  
Orbit\_and\_naris / 'Well-separated'  
Separated\_only\_by\_tiny\_quadrangular\_lacrimal, 26 Orbit\_location /  
'medial, framed by wide jugals laterally' 'lateral emplacement, framed by  
very slender jugals', 27 Orbit\_margins / Raised\_well\_above\_skull\_plane  
flush\_with\_roof, 28 Palpebral\_ossifications /  
ossifications\_in\_orbit\_restricted\_to\_sclerotic\_ring  
numerous\_additional\_ossicles\_at\_medial\_margin\_of\_sclerotic\_ring, 29  
Pineal\_foramen / Present Absent\_in\_adults, 30 Interorbital\_distance /  
Narrower\_than\_or\_equal\_to\_orbital\_width wider, 31 'Frontal-nasal (length)'  
/ Frontal\_as\_long\_or\_longer\_than\_nasal shorter, 32 'Frontal-nasal  
(suture). ' / Level\_with\_or\_anterior\_to\_the\_orbit\_margin  
further\_posterior, 33 'Lateral line sulci (adults)' / present absent, 34  
'Sulci (skull roof)' / Throughout\_skull\_roof\_if\_present\_ 'confined to  
circum-orbital region', 35 Infraorbital\_sulcus /  
With\_simple\_curve\_on\_lacrimal\_ 'with pronounced S-shaped lacrimal  
flexure', 36 Supraorbital\_sulcus / Passing\_entirely\_through\_nasal\_  
entering\_prefrontal\_and\_lacrimal, 37 'Maxilla (anterior margin)' /  
Straight laterally\_convex\_due\_to\_enlarged\_teeth, 38 'Maxilla (contact to  
nasal)' / 'Absent, separated by lacrimal' present, 39 'Prefrontal-  
frontal' / Prefrontal\_substantially\_longer\_than\_frontal  
ending\_at\_one\_level\_with\_frontal, 40 'Prefrontal (anterior end)' /  
Pointed\_wide\_and\_blunt, 41 'Prefrontal (lateral suture)' /  
straight\_or\_concave with\_marked\_medial\_projection\_of\_jugal\_near\_the\_orbit,  
42 'Prefrontal-postfrontal' / sutured separated\_by\_frontal, 43  
'Prefrontal (process)' / 'prefrontal-lacrimal suture simple'  
prefrontal\_underlying\_lacrimal\_laterally\_to\_reach\_palatine, 44  
'Prefrontal-jugal' / separated\_by\_lacrimal\_in\_contact, 45 'Prefrontal-  
maxilla' / separated\_by\_lacrimal\_in\_contact, 46 'Posterior skull table  
(length)' / more\_than\_.6\_times\_width less\_than\_.6\_times\_width, 47  
Postorbital\_shape / 'long triangular, wedged between squamosal and  
supratemporal' short, 48 'Postorbital (end)' /  
posterior\_end\_acutely\_triangular\_with\_fingerlike\_projections, 49  
Postorbital / not\_wider\_than\_orbit  
with\_substantial\_lateral\_process\_projecting\_into\_jugal, 50 'postorbital,  
postfrontal' / shorter\_than\_supratemporal\_and\_parietal  
asl\_long\_or\_longer, 51 Otic\_notch /  
semicircular\_embayment\_between\_squamosal\_and\_posterior\_skull\_table  
straight\_transverse\_posterior\_skull\_margin\_without\_embayment\_between\_cheek  
\_and\_table, 52 'Otic notch (position)' / 'Lateral, expanding along entire  
cheek to form continuous unornamented area up to quadrate' slit\_like

'small and rounded, confined to dorsomedial part of squamosal', 53  
Supratemporal / longer\_than\_wide 'quadrangular, giving a foreshortened  
posterior skull table', 54 'Supratemporal (width)' / 'rectangular, with  
straight sagittal lateral margin'  
posterolaterally\_constricted\_by\_expanded\_otic\_notch  
small\_and\_oval\_in\_shape, 55 Supratemporal\_flange /  
squamosal\_continuously\_ornamented\_around\_margin\_of\_otic\_notch 'squamosal  
having dorsally-exposed and ornamented area (supratympanic flange)  
stepping abruptly into steeply aligned poorly ornamented portion', 56  
Semilunar\_flange /  
Supratemporal\_without\_ventral\_projection\_into\_otic\_notch  
supratemporal\_forming\_marked\_ventral\_flange\_participating\_in\_medial\_border  
ing\_of\_otic\_notch, 57 'Jugal (ventral process)' / no\_ventral\_outgrowth  
insula\_jugalis\_framing\_subtemporal\_window, 58 'Jugal (anterior extension)'  
/ Jugal\_ending\_at\_or\_behind\_level\_of\_anterior\_orbit\_margin  
extending\_anteriorly, 59 'Jugal-lacrima' / in\_contact  
separated\_by\_orbit\_or\_palate\_bones, 60 Intertemporal / present absent, 61  
Intertemporal\_and\_postorbital / postorbital\_lateral\_to\_postfrontal  
'expanding medially to replace intertemporal, contacting parietal', 62  
'Squamosal-tabular (dorsal)' / separated\_by\_supratemporal\_sutured, 63  
tabular\_and\_squamosal /  
forming\_either\_squamosal\_embayment\_or\_straight\_posterior\_margin  
'projecting posteriorly, with tabular extended posterolaterally', 64  
'Squamosal (falciform crest)' / posterior\_rim\_of\_squamosal\_straight 'with  
convex projection, referred to as falciform crest', 65 'Tabular (horn)' /  
present\_in\_some\_form\_entirely\_absent, 66 Tabular\_extension /  
tabular\_horn\_pointing\_posteriorly\_if\_present aligned\_laterally  
sutured\_with\_squamosal\_posterior\_to\_otic\_notch, 67 'Tabular (ventral  
crest)' / absent present\_and\_shallow  
forming\_a\_deep\_ridge\_that\_almost\_doubles\_the\_thickness\_of\_the\_tabular\_in\_o  
ccipital\_view, 68 'quadratojugal (medial process)' / absent present, 69  
'Quadratojugal-maxilla' / in\_contact separated\_by\_jugal, 70 'quadrate  
(dorsal process)' / absent present, 71 Posterior\_skull\_rim /  
quadrate\_trochlea\_posterior\_to\_tabular\_horns\_at\_one\_level\_or\_anterior, 72  
Occipital\_flange /  
Descending\_flange\_of\_occipital\_portion\_of\_postparietals\_forming\_a\_bulge  
long\_smooth\_blades\_as\_long\_as\_the\_dermal\_portion\_of\_the\_postparietal, 73  
'Postparietal-exoccipital' / no\_contact 'pillar-like dorsal process of  
exoccipital firmly sutured to ventral side of postparietal and oblique  
process of exoccipital sutured with ventral ramus of tabular', 74  
Postfenestral\_window / 'large opening, having at least double the width  
of the foramen magnum' reduced\_to\_a\_tiny\_foramen, 75  
Quadrate\_and\_occipital\_condyles /  
quadrate\_condyles\_posterior\_to\_occipital\_ones\_at\_the\_same\_level  
well\_anterior, 76 Epipterygoid / simple\_rodlike\_ascending\_process  
complicated\_and\_robust\_element\_with\_up\_to\_six\_processes, 77 'Dentition  
(marginal)' / 'heterogeneous, varying sizes and distances' 'homogeneous,  
small teeth, equidistant', 78 'Dentition (upper jaw)' /  
contical\_to\_slightly\_curved\_inwards\_caniniform, 79 'Dentition (marginal,  
tooth bases)' / Round\_or\_oval\_forming\_transversely\_broadened\_ovals, 80  
'Palatal tusks (cross-section)' / round\_or\_oval  
laterally\_compressed\_and\_keeled\_at\_least\_on\_one\_side, 81 'Dentition  
(vomer)' / tooth\_patches\_present\_at\_least\_in\_small\_specimens  
dentition\_entirely\_restricted\_to\_vomerine\_fangs, 82 Pedicely /  
All\_teeth\_formed\_consisting\_of\_a\_single\_mineralized\_conus

at\_least\_some\_teeth\_with\_two\_separate\_mineralization\_centres, 83  
Bicuspidity / all\_teeth\_with\_single\_tip  
at\_least\_some\_with\_bicuspid\_crowns, 84 Labyrinthodonty /  
Teeth\_with\_labyrinthine\_infolding\_of\_dentine\_and\_enamel\_at\_base  
never\_labyrinthodont, 85 'Transverse tooth row (transvomerine)' / absent  
present\_and\_transverse 'V-shaped', 86 Additional\_vomerine\_fangs /  
vomer\_with\_a\_single\_pair\_of\_fangs\_at\_the\_medial\_margin\_of\_choana 'with  
additional fangs/fang pairs posteromedially', 87 'Parasphenoid (shagreen)'  
/ tooth\_patches\_present teeth\_entirely\_absent, 88 'Ectopterygoid (fangs)'  
/ present absent, 89 Interpterygoid\_vacuities / 'Slender and slit-like'  
'rounded, oval openings', 90 'Interpterygoid vacuities, pterygoid' /  
vacuities\_roundly\_bordered\_by\_moderately\_concave\_pterygoid 'laterally  
greatly extended at mid-level pushing pterygoid to the margin', 91  
Anterior\_palatal\_openings / Vomer\_and\_premaxilla\_with\_continuous\_suture  
perforated\_to\_accommodate\_symphyseal\_fangs, 92 Anterior\_palatal\_openings /  
unpaired\_if\_present paired, 93 Vomer / narrow\_and\_small 'large plate,  
widely separating choanae', 94 'Vomer (paired anterior depressions)' /  
absent present, 95 Anterior\_palatal\_depression /  
Posterior\_rim\_round\_if\_present straight\_transverse, 96 Vomerine\_ridges /  
absent 'present, radiating from vomerine tusks anteriorly', 97  
Vomerine\_pit\_and\_fontanelle / absent 'pit present (posterior to  
mandible)' fenestra\_within\_such\_pit, 98 Vomerine\_septum / absent present,  
99 'Choana (lateral)' / Anterolaterally\_expanded\_with\_triangular\_outline  
oval, 100 'Choana (medial)' / Medial\_margin\_straight\_or\_gently\_convex  
anteromedially\_expanded\_giving\_choana\_a\_reniform\_outline, 101 Choana\_width  
/ 'elongated oval to slit-like' wide\_round, 102 'Vomer-pterygoid' /  
sutured\_separated\_by\_palatine, 103 'Vomer (anterior part)' /  
anterior\_portion\_shorter\_than\_behind\_anterior\_level\_of\_choana  
as\_long\_or\_longer, 104 'Vomer (extension)' /  
vomer\_contacts\_pterygoid\_lateral\_to\_choana expanding\_posteriorly, 105  
Basipterygoid\_ramus / 'Pterygoid with short, posteromedially curved  
basipterygoid process, constricting palatal vacuities posterolaterally  
'with\_transversely\_extended\_process\_producing\_posteriorly\_wider\_vacuities,  
106 'Basicranium (contact)' / Joint\_between\_basal\_plate\_and\_pterygoid  
sutural\_contact, 107 Basicranium\_suture / ' Suture (if present) much  
shorter than basal plate, reaching at best 40% its length'  
suture\_almost\_as\_long\_as\_basal\_plate\_, 108 parasphenoid /  
sutured\_or\_fused\_with\_exoccipitals underplating\_exoccipitals, 109  
'Basicranium (carotids)' /  
Internal\_carotids\_entered\_basicranium\_ventrally\_near\_base\_of\_cultriform\_pr  
ocess posterolateral\_corner\_of\_bone, 110 Parasphenoid\_plate /  
Basal\_plate\_sagittally\_rectangular\_quadrangular\_to\_wider\_than\_long 'much  
abbreviated, transversely rectangular ', 111 'Parasphenoid plate (size)' /  
Basal\_plate\_at\_level\_posterior\_to\_basicranial\_joint\_substantially\_narrower  
\_than\_parietals\_as\_wide\_or\_wider, 112 'Cultriform process (width)' /  
'Base not wider than rest, clearly set off from basal plate '  
merging\_continuously\_into\_plate flaring\_anteriorly, 113 'Cultriform  
process (structure)' / ventrally\_flat with\_ridge\_emplaced\_on\_broader\_base  
'knife-edged or keel-shaped', 114 'Cultriform process (outline)' /  
of\_similar\_width\_throughout  
posteriorly\_expanding\_abruptly\_to\_about\_twice\_the\_width, 115 'Cultriform  
process (dentition)' / main\_shaft\_edentulous\_except\_for\_base  
with\_elongate\_tooth\_patch, 116 'Parasphenoid (posterolateral process)' /  
posterolateral\_margin\_straight with\_lateral\_wing, 117 'Pterygoid (ventral  
ornament)' / Palatine\_ramus\_of\_pterygoid\_smooth



ornamented\_with\_reticulate\_ridges, 118 'Pterygoid/exoccipital' /  
no\_contact\_sutured\_lateral\_to\_parasphenoid, 119 'Pterygoid/basioccipital'  
/ no\_contact\_sutured\_lateral\_to\_parasphenoid, 120 'Pterygoid-squamosal' /  
entirely\_sutured\_with\_open\_fissure, 121 Pterygoid\_flange /  
palatine\_ramus\_of\_pterygoid\_merging\_continuously\_into\_pasipterygoid\_ramus  
broadening\_abruptly\_to\_form\_transverse\_flange, 122 Pterygoid\_width /  
palatine\_and\_quadrate\_regions\_forming\_slender\_rami broad\_shelves, 123  
'Ptergoid-ectopterygoid' / palatine\_ramus\_exclusively\_formed\_by\_pterygoid  
with\_posteromedial\_projection\_of\_ectopterygoid, 124 'Pterygoid-palatine-  
actopterygoid' / pterygoid\_contacting\_both\_ectopterygoid\_and\_palatine  
pterygoid\_contacting\_ectopterygoid\_only, 125 'Palatine/ectopterygoid' /  
with\_simple\_transverse\_suture  
palatine\_with\_posterolateral\_process\_excluding\_the\_ectopterygoid\_from\_inte  
rpterygoid\_vacuity\_and\_contacting\_pterygoid, 126 'Palatine/vomer' /  
suture\_aigned\_posterolaterally  
with\_medial\_wing\_framing\_interpterygoid\_vacuity\_anteriorly, 127 'Palatine  
(LEP)' / absent present, 128 'Palatine/ectopterygoid (ontogeny)' /  
maintain\_their\_width\_become\_proportionately\_wider, 129  
'Palatine/ectopterygoid (width)' / much\_wider\_than\_maxilla\_as\_narrow, 130  
'Palatine/ectopterygoid (continuous tooth row)' / absent present, 131  
'Ectopterygoid (length)' / as\_long\_or\_longer\_than\_palatine  
markedly\_shorter, 132 'Ectopterygoid (LEE)' / Absent present, 133  
'Ectopterygoid (Y-shaped)' /  
Ectopterygoid\_with\_continuous\_maxillary\_suture 'Y-shaped with posterior  
half separated from maxilla by gap', 134 Palate\_structure / 'in occipital  
view, pterygoids either sloping continuously ventrolaterally or flat  
horizontal' vertically\_curved\_ventrally\_at\_right\_angle\_with\_basiscranium,  
135 Quadrate\_trochlea /  
Medial\_bulge\_only\_slightly\_larger\_than\_lateral\_one  
being\_at\_least\_two\_times\_longer\_and\_twice\_as\_wide, 136 Occipital\_condyle /  
'Trilobed, with basioccipital forming ventral part of facet'  
bilobed\_exoccipital\_condyle\_with\_reduced\_basioccipital\_contribution, 137  
Exoccipital\_condyles / 'short and broad-based, projecting only with their  
posterior half behind rim of skull table'  
almost\_the\_complete\_element\_posterior\_to\_level\_of\_occipital\_flange, 138  
'Basioccipital (length)' /  
Forming\_a\_long\_element\_posterior\_to\_parasphenoid\_plate  
foreshortened\_to\_a\_narrow\_posterior\_rim\_of\_the\_palatal\_bone, 139  
Dentigerous\_palatal\_ossicles / Absent  
present\_within\_interpterygoid\_vacuities, 140 Postglenoid\_area /  
absent\_or\_present\_as\_very\_faint\_outgrowth longer\_than\_glenoid\_facet, 141  
'Postglenoid area (types)' / Type\_1 Type\_2, 142 'Postglenoid area  
(dorsal)' / plain with\_elongated\_groove, 143 Hamate\_process / absent  
present\_but\_lower\_than\_postglenoid\_portion\_is\_long  
as\_high\_as\_retroarticular\_process, 144 Preglenoid\_process /  
labial\_side\_of\_surangular\_with\_straight\_dorsal\_margin\_anterior\_to\_glenoid  
forming\_dorsal\_projection\_well\_above\_the\_level\_of\_the\_glenoid\_articulation  
, 145 Meckelian\_window / small\_round\_or\_oval\_window  
elongate\_window\_shorter\_than\_the\_adductor\_fossa as\_long\_or  
longer\_than\_adductor\_fossa, 146 Symphyseal\_teeth /  
no\_accessory\_teeth\_posterior\_to\_symphyseal\_tusks  
transverse\_row\_of\_such\_teeth, 147 Posterior\_coronoid\_teeth / present  
absent, 148 'Anterior/middle coronoid teeth' / present absent, 149  
Mandibular\_osteoderms / throat\_region\_naked  
covered\_with\_mosaic\_of\_ventral\_osteoderms\_between\_mandible\_and\_dermalpecto

ral\_girdle, 150 'Stapes (quadrate process)' / absent present, 151 'Stapes (ventral process)' / absent 'present, giving the proximal region two heads', 152 'Stapes (shape)' / robust\_tetrahedral\_bone\_with\_substantial\_quadrate\_process  
 rodlike\_element\_with\_elongated\_stylus bladelike, 153 'Stapes (curvature)' / Stapes\_with\_pronounced\_dorsodistal\_curvature 'abbreviated without curvature, directed laterally towards vertically aligned otic notch', 154 Ceratobranchials / bony\_elements\_absent present\_in\_adults, 155 Basibranchial / bony\_elements\_absent present\_in\_adults, 156 Hypobranchial\_elements / Bony\_elements\_absent present\_in\_adults, 157 Branchial\_denticles / 'conical and attached to small ossicles in groups of 2-10' 'free and with brush-like end', 158 Presacral\_count / '>28' '23-25' '<21', 159 Caudal\_count / ~presacral\_count\_or\_higher much\_lower, 160 transverse\_process\_orientation / 'short, directed posteriorly' distally\_extended\_with\_diapophysis\_pointing\_laterally, 161 'Transverse process (length)' / shorter\_than\_dorsal\_spine\_is\_high markedly\_longer, 162 Neural\_spine\_height / as\_high\_as\_distance\_between\_zygopophyses higher, 163 Intercentrum\_shape / presacral\_intercentra\_form\_simple\_wedges dorsally\_closed\_discs dorsally\_closed\_and\_elongate\_cylinders, 164 'Intercentrum (width)' / chordal\_canal\_wider\_than\_intercentrum\_high narrower, 165 'Intercentrum (ventral surface)' / ventral\_surface\_shorter\_than\_wide\_in\_ventral\_view 'as long as wide, quadrangular', 166 Intercentrum\_anterior\_surface / always\_concave convex\_at\_least\_in\_some\_presacral\_centra, 167 Parapophysis / segmental intersegmental, 168 Pleurocentrum\_presence / ossified unossified, 169 Pleurocentrum\_lateral\_surface / as\_large\_as\_that\_of\_intercentrum smaller, 170 'Pleurocentrum (ventral extension)' / wedged\_between\_successive\_intercentra\_and\_not\_reaching\_ventral\_margin\_of\_intercentra pleurocentra\_ventrally\_expanded\_to\_near\_each\_other ventrally\_fused\_to\_form\_single\_cylindrical\_element, 171 'Ribs (length)' / moderately\_elongate\_thoracic\_ribs\_curved\_distoventrally such\_ribs\_foreshortened\_without\_distal\_curvature, 172 'Ribs (ventral extension)' / 'rib heads (tuberculum and capitulum) confluent' 'clearly set off and widely separated in mid-trunk region', 173 'Ribs (uncinate blades)' / 'if present, small and spine like' extensive\_and\_bladelike, 174 'Ribs (uncinate spines)' / short 'elongated, as long as shaft', 175 Cleithrum / with\_broadened\_dorsal\_head\_region simple\_rod, 176 Cleithrum / head\_with\_slightly\_convex\_or\_straight\_anterior\_rim with\_pronounced\_anterior\_projection, 177 Cleithrum / Dorsal\_head\_region\_confined\_to\_anterior\_rim\_of\_scapula posteriorly\_extended\_to\_cover\_dorsal\_rim\_of\_scapula, 178 'Clavicle (ventral blade)' / 'wide, triangular, overlapping interclavicle broadly' 'slender, with minor overlap', 179 Interclavicle\_length / shorter\_than\_posterior\_skull substantially\_longer, 180 'Interclavicle (ontogeny)' / without\_major\_proportional\_change\_in\_ontogeny decreasing\_proportionally\_relative\_to\_skull\_length, 181 'Interclavicle (central ornamented area)' / rhomboidal pentagonal\_and\_posteriorly\_widest, 182 'Interclavicle (proportions)' / as\_long\_as\_wide 1.3\_times\_as\_long\_as\_wide more\_than\_twice\_as\_long\_as\_wide, 183 'Interclavicle (posterior margins)' / with\_posterior\_process transversely\_straight, 184 'Interclavicle (anterior margin)' / serrated smooth, 185 'Interclavicle (anterior stylus)' / 'Anterior portion of interclavicle variably shaped but not longer than posterior one, as measured by the centre of ornamentation' substantially\_longer\_than\_posterior\_one\_, 186 'Interclavicle (posterior

stylus)' / posterior\_end\_rounded\_or\_blunt  
with\_elongated\_stylus\_or\_parasternal\_process, 187 'Interclavicles,  
clavicles' / Clavicles\_broadly\_separated\_by\_interclavicle\_ventrally\_  
leaving\_only\_narrow\_stripe\_of\_interclavicle\_in\_between  
in\_contact\_and\_excluding\_anterior\_part\_of\_interclavicle\_from\_ventral\_expos  
ure, 188 'Scapula (glenoid facet)' / ossified unossified\_in\_adults, 189  
'Scapula (height)' / 'Maximally two times longer (higher) than wide'  
'dorsally extended and fully ossified, three times higher than wide', 190  
'Humerus (ontogeny)' / 'Short cylinder in larvae, elongates at slow rate'  
'with\_substantial\_shaft\_in\_larvae\_very\_long\_rod\_from\_small\_stages\_on,  
191 'Humerus (adult shaft)' / 'No shaft proper, humerus blade-like in  
cross-section' 'with short shaft oval in cross-section' 'shaft elongate  
and slender, comprising more than 50% of the humerus with rounded cross-  
section', 192 'Humerus (entepicondylar foramen)' / present absent, 193  
'Humerus (supinator)' / present absent, 194 'Humerus (condyles)' /  
Distal\_end\_at\_least\_partially\_ossified\_with\_identifiable\_condyles  
unfinished\_without\_condyles 'with fully-established condyles', 195  
'Humerus (torsion)' / 'strong (70-90deg)' 'weak, well below 60deg', 196  
Carpals / all\_unossified\_at\_least\_some\_ossified, 197 Manual\_digit\_count /  
five\_four\_or\_less, 198 'Ilium (shaft)' /  
shaft\_of\_variable\_length\_but\_laterally\_flattened\_very\_long\_and\_slender,  
199 'Ilium (dorsal end)' / Tip\_of\_dorsal\_end\_continuous\_much\_broadened,  
200 'Ilium (height)' / shaft\_more\_than\_twice\_the\_length\_of\_base shorter,  
201 'Ilium (orientation)' / main\_axis\_of\_shaft\_inclined\_posterodorsally  
vertical anterior, 202 'Ilium (tip)' / 'dorsal end two-headed' 'single-  
headed', 203 Pubis / unossified ossified, 204 Femur /  
intercondylar\_fossa\_forming\_deep\_and\_elongated\_trough  
reduced\_to\_short\_depression, 205 'Femur (trochanter)' /  
internal\_trochanter\_present\_as\_discrete\_process reduced\_to\_shallow\_crest  
greatly\_enlarged\_to\_form\_a\_massive\_projection, 206 tarsals /  
at\_least\_some\_ossified all\_unossified, 207 Gastral\_squamation /  
ossified\_ventral\_dermal\_scales scales\_absent, 208 Squamation / 'Dermal  
scales oval to spindle-shaped' 'broad oval with "microsaur-type"  
ornament', 209 Osteoderms / Absent present\_as\_single\_row 'more numerous,  
forming a carapace', 210 'Osteoderms (articulations)' /  
simple\_set\_of\_osteoderms\_arranged\_in\_one\_layer\_if\_present 'double set of  
two layers, the ventral one fused to tip of neural arch', 211 'Osteoderms  
(width)' / narrow\_median\_osteoderms 'transversely-extended plates', 212  
Rib\_cage / trunk\_narrower\_than\_skull\_or\_as\_wide  
trunk\_substantially\_wider\_than\_lateral\_margin\_of\_cheeks\_at\_about\_midlevel,  
213 Basal\_skull\_length / '>70mm' '50-70mm' '30-50 mm' '<30 mm', 214  
Skull\_to\_trunk / '>=.45' '.3-.45' '.2-.29' '<.2', 215 Skull\_proportions /  
longer\_than\_wide wider\_than\_long, 216 Supratemporal / present absent, 217  
Supratemporal\_exposure\_on\_occiput / absent present, 218 postfrontal\_shape  
/ broadly\_quadrangular falciform, 219 'Lacrimal-naris contact' / present  
absent, 220 Lacrimal\_contribution\_to\_orbit / absent present, 221  
Lacrimal\_orbital\_processes / only\_ventral\_present  
dorsal\_and\_ventral\_present neither\_present, 222 Quadratojugal / present  
absent, 223 Frontals / paired\_along\_midline fused, 224  
frontal\_contribution\_to\_orbit / no yes, 225 Septomaxilla / ossified  
not\_ossified, 226 Prefrontal\_contributes\_to\_external\_naris / distant\_from  
near present, 227 External\_naris\_in\_dorsal\_view / exposed not\_exposed,  
228 Posterior\_skull\_margin / concave straight convex undulating, 229  
Large\_otic\_notch\_approaching\_orbit / absent intermediate present, 230  
Postorbital / present absent, 231 Shape\_of\_postorbital /

irregular\_trapezoid 'triangular, apex caudal', 232 'Parietal-postorbital contact' / absent present, 233 Parietal\_squamosal\_contact / absent present, 234 'Parietal-tabular contact' / absent present, 235 Postparietals / paired fused absent, 236 'Postparietal-squamosal contact' / absent present, 237 Postparietal\_length / large\_quadrangular 'abbreviated anteroposteriorly, elongate lateral rectangular', 238 'Squamosal-jugal contact' / present absent, 239 Tabular / present absent, 240 Maxilla\_into\_external\_naris / present absent, 241 Maxilla\_forms\_entire\_ventral\_naris / present absent, 242 Number\_of\_premaxillary\_teeth / '>=10' '5-9' '<5', 243 Number\_of\_maxillary\_teeth / '>=30' '20-29' '<20', 244 Teeth\_laterally\_compressed / no yes, 245 Occipital\_profile / low\_and\_wide high\_and\_wide high\_and\_narrow, 246 Supraoccipital / absent present, 247 Jugular\_foramen / between\_opisthotic\_and\_exoccipital through\_exoccipital, 248 Anterior\_palatine / short\_anteromedial\_process\_articulating\_with\_vomer\_at\_choana 'long anteromedial process, more medial than lateral' palatine\_absent, 249 Denticles\_on\_pterygoid / present absent, 250 Teeth\_on\_pterygoid / absent present, 251 Denticles\_on\_vomers / present absent, 252 Denticles\_on\_palatines / present absent, 253 Denticles\_on\_parasphenoid / present absent, 254 Cultriform\_process\_contact\_with\_vomer / narrow broad, 255 Stapes / perforated\_columella imperforate\_columella no\_columella, 256 Pleurosphenoid / unossified ossified, 257 Sphenethmoid / ossified unossified, 258 Pterygoids\_contact\_anteriorly / present absent, 259 Lateral\_process\_of\_pterygoid\_contribution\_to\_posttemporal\_fossa / absent present, 260 Dentary / long short, 261 Dentary\_forms\_coronoid\_process / absent present, 262 Surangular / normal reduced absent, 263 Angular / narrow deep, 264 Number\_of\_splenials / two one none, 265 Splenial\_exposed\_laterally / present absent, 266 Meckelian\_fossae / 2\_or\_more one none, 267 'Ventral border of meckel's fossa' / splenial angular, 268 Retroarticular\_process / straight hooked, 269 Articulation\_to\_tooth\_row / above equal below, 270 'angular extends to (lat view)' / posterior\_tooth\_row middle\_of\_tooth\_row, 271 Number\_of\_coronoids / 3 2 1 0, 272 Coronoid\_teeth / present absent, 273 Coronoid\_teeth / larger\_than\_marginals equal\_to\_marginals smaller\_than\_marginals, 274 Symphysis / dentary\_and\_splenial dentary\_only, 275 Jaw\_sculpture / present absent, 276 Ossified\_hyoids / present absent, 277 parahyoid / absent present, 278 Trunk\_intercentra / present absent, 279 Trunk\_neural\_arch\_to Centrum / loosely\_articulated sutured fused, 280 Base\_of\_neural\_spine / equal\_to\_or\_wider\_than\_haemal smaller\_than\_haemal\_spine, 281 Haemal\_arches / present absent, 282 Haemal\_arches / loosely\_articulated\_to\_intercentrum fused\_to\_midlength\_of\_Centrum, 283 Haemal\_arches / longer\_than\_or\_equal\_to\_neurals shorter\_than\_neurals, 284 haemal\_arch\_shape / 'non-parallel (triangular)' 'parallel (rectangular)', 285 Spinal\_nerve\_foramina / absent present, 286 Transverse\_process / on\_arch\_pedicel on\_Centrum, 287 'Atlas-axis intercentra' / present absent, 288 Atlas\_anterior\_Centrum / same\_size\_as\_posterior laterally\_expanded, 289 Atlas\_Centrum / multipartite single\_notochordal single\_odontoid, 290 Atlas\_neural\_arch / loosely\_articulated sutured\_to\_Centrum fused\_to\_Centrum, 291 Atlas\_parapophyses / on\_Centrum on\_transverse\_processes absent, 292 Atlas\_neural\_arch / paired sutured\_at\_midline fused, 293 Proatlantes / present absent, 294 Second\_cervical\_arch / expanded\_to\_more\_posterior equal\_to\_more\_posterior shorter\_than\_more\_posterior, 295 Cervical\_rib\_distal\_shape / spatulate

pointed, 296 Ribs\_anterior\_to\_sacrum / short long, 297  
Sacral\_parapophysis / on\_centrum on\_transverse\_process, 298  
Number\_of\_caudal\_ribs / 5\_or\_more 4 3 2\_or\_fewer, 299  
Supraglenoid\_foramen / present absent, 300 Number\_of\_coracoid\_foramina /  
none one two, 301 Scapulocoracoid\_ossification / both scapula\_only  
absent, 302 Deltapectoral\_crest / weak intermediate prominent, 303  
Humerus\_length / 'long (>4 centra)' short, 304 'Radius:humerus' / '>=.7'  
'<.5' '<.5', 305 Olecranon\_process / unossified ossified, 306  
Basale\_commune / absent present, 307 Femur / long short, 308  
Elongate\_tibiae\_and\_fibulae / absent present, 309  
Number\_of\_distal\_tarsals / 6 5\_or\_fewer, 310  
Dorsal\_margin\_of\_splenial\_only\_contacts\_first\_coronoid / absent present,  
311 Parietal\_anterior\_waisting / absent present, 312  
Parietal\_width\_relative\_to\_frontal / greater less\_than\_or\_equal\_to, 313  
Skull\_table / rectangular 'T-shaped', 314 Prefrontals / present absent,  
315 Postfrontals / present absent, 316 'Squamosal-frontal contact' /  
contact no\_contact, 317 Zygokrotaphy /  
stegokrotaphy\_including\_roofing\_bones\_like\_tabulars\_and\_supratemporals  
zygokrotaphy\_with\_muscles\_approaching\_skull\_midline  
stegokrotaphy\_in\_the\_absence\_of\_roofing\_bones\_such\_as\_tabulars\_and\_suprate  
mporals zygokrotaphy\_but\_muscle\_does\_not\_extend\_through\_temporal\_fossa,  
318 'Quadrate-maxilla separated by' / pterygoid  
small\_pterygoid\_and\_pterygoid\_process\_of\_quadrate 'by pterygoid process of  
quadrate only (pterygoid absent)', 319 'Quadrate-maxillopalatine' /  
contact\_laterally do\_not\_contact\_laterally, 320 Ceratobranchials /  
3\_and\_4\_fused\_and\_enclosing\_larynx not, 321 Tentacle / absent  
present\_adjacent\_to\_eye between\_eye\_and\_naris beneath\_naris, 322  
Splenial\_teeth / present absent, 323 Choanal\_openings / small large, 324  
Sphenethmoid / covered\_dorsally exposed\_dorsally, 325 Larval\_stage /  
present 'absent, direct development', 326 Anterior\_dentary\_teeth /  
bicuspid monocuspid, 327 Nasal\_septum / not\_ossified '20-35% of total  
skull length' less\_than\_20%\_of\_total\_skull\_length, 328  
Dorsomedial\_process\_of\_the\_sphenethmoid / absent  
11%\_or\_more\_of\_total\_skull\_length 10%\_or\_less\_of\_total\_skull\_length, 329  
Dorsomedial\_process\_of\_the\_sphenethmoid / thin\_and\_rodlike  
thick\_and\_broad, 330 Dorsal\_sutural\_surface\_of\_the\_sphenethmoid /  
narrow\_and\_weakly\_tapered broad\_and\_triangular\_and\_strongly\_tapered, 331  
Sola\_nasi / absent present\_and\_connected\_to\_the\_nasal\_septum\_ventrally  
'present, rodlike or tubular', 332 Lateral\_walls\_of\_the\_sphenethmoid /  
14%\_or\_less\_than\_the\_total\_skull\_length  
15%\_or\_greater\_of\_the\_total\_skull\_length, 333  
Margin\_of\_the\_floor\_of\_the\_anterior\_portion\_of\_the\_parasphenoid / narrow  
'broad, tapers continuously to a point' rounded\_anteriorly 'markedly  
tapered, resulting in a bottleneck appearance' 'rod-like distal tip', 334  
Parasphenoid\_margins /  
absence\_of\_lateral\_constriction\_posterior\_to\_basicranial\_articulations  
weak\_constriction\_posterior\_to\_basicranial\_articulations\_present 'strong  
constriction posterior to basicranial articulations, reaching to the  
carotid foramina', 335 Skull\_roof\_exposure\_of\_the\_os\_basale /  
moderate\_exposure\_at\_the\_dorsal\_midline  
little\_to\_no\_exposure\_near\_the\_dorsal\_midline  
very\_wide\_exposure\_near\_the\_dorsal\_midline, 336 Fenestra\_vestibuli /  
'large, subcircular' 'anteroposteriorly elongate, oval' 'very small,  
subcircular', 337  
Canal\_for\_palatal\_ramus\_of\_the\_facial\_nerve\_in\_antotic\_region / absent





*Acanthostomatops\_vorax*

000000011100111000000000000001101?0000100100011000001000010101000000101010  
10000000000000100010002000000011000110001000000000000000000000000010110000000?  
0111000101100000000000100000010000000001011101101011011?011000000010000100  
000000001000001000100000?0000001??11????????????????????0000?001000??????0??0  
?0???10?000??10100?001?011011?????00?????????000

*Zatrachys\_serratus*

000000011100111000000000000001101?0000100100011000001000000101000000101010  
1?00000000000001000100020000000110001120010000000000000001000010110000000??  
0????00????????????????????????????????????????????????????????1?????0?000000000100  
00000100000000010001??00000000001?????????????????????????????????????????????  
?????????????????????????????????????????????????????????????????????????????0?

*Micromelerpeton\_credneri*

000000000100000000100000001100000000000101100110000000010011000000011?0010  
0?00000001010010001000200001001000011000000001100000100000000??1?000000000  
011110010000000000000100000001000000001011100101010011?110100002100010100  
0110010010000000001?????????????????????????????????????????????????????????  
?????????????????????????????????????????????????????????????????????????????0

*Limnogyrinus\_elegans*

000000000100000000100000001100000000000011001100000000?0011000000011?1010  
1?00001001000010001000000001001000011000000001000000?00000000??1?0000000??  
011110?1000000??0000?0000000100000000010111?1?010?0011?110100002?00000100  
0010000010000000001?????????????????????????????????????????????????????????  
?????????????????????????????????????????????????????????????????????????????0

*Apateon\_pedestris*

000000000100100000100000001000001?000011011001100000100?0011000000011?1010  
1?10001?00001010001000000001001000021000000001100000100010100??1?000000011  
01111011120000??000002100010010000000000022111??1010011?110000002110010100  
011201001000000000101000?111110?01110000?????1?????00000?????00?????????  
??0?10020000??10000?0011011001?????00?????????000

*Micropholis\_stowi*

00100000010000000010000000110000100000010110011000000000001101000001111010  
10000000000101100010002001010010000210001000011001001010100001011000000011  
01111011?2100000000001100010010000000000?211001100001001000000020?0000120  
000?0000?0000001000??000?000000100011000001110010??100000?????00?0002??100  
??1?100110001?11000?001?0?00?1?????00?????????000

*Platyrhinops\_lyelli*

000000000100000000100000021100001?0000000110011000000101001100000001110010  
00100000100000110010000001010010000212001000001000001010100001011000000000  
011110?1?2?000000000011000100100000000002211001101001?00010000011000?01?0  
00100020000000100000000??0?????1??0110000201??0??0?01002?00?0000102?21?00  
?0??0?011000??01000?001?0?00?0?????00?????????000

*Amphibamus\_grandiceps*

000000000100000000100000021100001?0000010110011000001101001100000001110010  
0?1000011100011100100010010100100002100010000?100100101010000101?000000000  
01111011?2?0000000000210001001000000000?0221100110000100?000000031100?0100  
00000020100000100000000??000000100111000??????0?????1000?00?0000?00?21?00  
?00?01010??0?01000??01?0100?1?????00?????????000

*Doleserpeton\_annectens*

000000000100100000100000021100001?0000010110011000001001001100000001110010  
001000011100011100100010010010000210000000001001001010100001011000000010  
011110?0?100000000002100010010000000000?2112011000010000?000003?00010100  
01?00120100000100000000010000000?001100000000?01002?0100??00??000?1222????  
??????????0?0??01000?001?0??0?0?????00?????00??0000



Gerobatrachus\_hottoni

000000000100?00000100000021?0000??000?1011001100000?00?0011000000011?0010
1??0000?0100??11001000?00?01001000???200?00000000100101010000101?000000???
0?????0?0?210000000000?10001001?????????0??211201????010??0?0000?3111?10120
0101012????000100000000??1101?????0110?????????1????1??02?????????12??21?01
??????0?11????01100?101?0?0?0?????????????????????0?0

Dissorophus\_multicinctus

000000000100100000100000001101001?0000010110011000001011001100000001111010
2000000000001110001000?00001001100010000000000100000100000000101?000000000
011100?0?10001000000001000001100000000001?2112011011110000?011100100000100
01000010000000010010000000101110100100001??11000????0??00?????00?110?21110
000001011?00??01000?001?0?00?1???1???0???0???0?0

Cacops\_aspidephorus\_morrisi

000000000100100000100000001?00101?0000010110011000001011001100000001111010
0000000000001?100010002000010011000100000000001000001000010001011000000000
011100?0?21001000000001000001100000001001?2112011011110000?01100000000020
010000200000000000010100{0
1}0000000010011000110??????????????????????????????????????????????????????
????????????????????????????????0

Broiliellus\_texensis

000000000100000000100000001100001?0000010110011000001011001100000001111010
1?0000?000001?10001000?0000100110001000000000010000010000?000101?0000000??
011100?0?2?001000000001000001100000000001?21?20?101111000??011100110000100
0100012000000000000101000?0000000?0011000101???11??00??0??????????????????
????????????????????????????????????????????????????????0

Acheloma\_cumminsi

000000000100100001100000001?00101?0000010110011000000011001100000001111010
0001000000000010001000210000001100010000000000100000100001000101?0000000??
011100?0?2?000000000001000001100000000001?2102011011110000?010000?00000??0
01020000000000000001100000?0???????1?0?0100???01??00?0000000000????????00
?????0???0?0?00000?001?0110?10?????00?????0??0000

Phonerpeton\_pricei

000000000100100001100000001?00001?0000010110011000000011001100000001111010
00010000000001?10001000110000001100010000000000100000100001000101?000000000
011100?0?2???000000000?00001?0?????????01?21020??011110000?010000?00000??0
01020000000000000001100000?0???????1?0?0100???01??00?0000000000????????00
?????0???0?0?00000?001?0110?10?????00?????0??0000

Ecolsonia\_cutlerensis

000000000100000001100000001?00001?0000010110011000000011001100000001111010
0?0100?000000010001000110000001100010000000000100000100000000101?000000000
0?????0???000000000000100000110?0000000012210201?0111100000020000?10000110
01020000000000000001?000?0000000?0?1100000?0??0?00200?0001000100??????????
??0101?0000?0000????????????????????????????????000

Onchiodon\_labyrinthicus

000000000101001000000100000001101?001000010101000001000001010000000100010
0?00000000000010001100000010001100111001000000000000100000001011000000000
011100100100010000000000100000010000000000110201101111002000000001000000?0
0000000000000000001200000000000?001100000001??100200??000??????????????????
?????0?????????0010000?01?0?00?10????0000?????0??0000

Eryops\_megacephalus

000000000101001000000100000001101?001000010101000001000011010000000100010
000000000000001000110000001000110011100100000000000010000001011000000000
01110010?10001000000000010000001000000001?110201101111002000000001000000?0
000000?0000000000000000000?0???0?001100000001????????0??000000000????????00
?0??0?????????0?01000?001?0?0?0{0 1}?100??0?00?????0??0000



Broomistega\_putterilla

0000000001000000000000000100110000001001001000010020000110100010020100010
0?0010?0001000101110000000?001100111000010000000000000100000101?00000????
0????0?0???1000000???000?00000100101000?0?110100100001011100000000000010?0
0000000000000000011100010000000???100001?01001101?001?00?????01?????????0
??0?11110?10?011000?001??100?1?????00????????000

Lydekkerina\_huxleyi

00000000010000000000000000100100001001000001000010020000110101010010101010
101010100010011010101000000001001100111000011000000010000100000101?100001001
011100???1?100000000000000000010010100000?11000?10100101200000000?000000?0
00?00000000000000010100011000100100101001000{0
1}01101?001?00?????01?????????0?0?0102111?10?011000?001??100?1?????00?????
???000

Chomatobatrachus\_halei

00000000010000000000000000100100001000000001000010020000110101010010101010
1?1010100010011010101000000001001100111000011000000010000100000101?100001?00
0????0?????????????????????0??????0?????????????????1?????000000?000000?0
00?0000001000000001?????????????????????000?001101000200?????????????????????
?????????????110000?0?????1?0?1?????????????????????0?

Sangaia\_lavina

10000000010000000000000000110010000?1010000010000011?0000?001011010?0?01010
1?10101000?01?101000000000010011101111000010010000?000100000101?0?000???
0????0?????????????0?????????0?????????????????1?????1?????000000?10001100
000000000000000001000001?00?????????10?????????????????????????????????????
?????????????????11000?001?????0?????????????????????????????

Peltostega\_erici

10101100010000000000?00110110000?0?0?0?0?00001020000?001010100?0?00010
??101?1000?001110000010?0011110010000010101?0?0?0000111????????????
?????????????????????????????????????????????????????????????0?0000????0
00?00000000000000?000000000000000000000000000000000000000000000000000000000
????????????????????????????????????????????????????????????????????????????
?????????????????????????????????????????????????????????????

Laidleria\_gracilis

1110000001000000000010?0011001000001010100011000011?0000?0?1011010?0?01011
2?10101000001110111000000001001110111100001001000101000100000101?1?000????
0????0?0??2100200001?00000?0?010????0?????1111?????????1?????002001010000????0
01100100000000000011?00011001110??11100000???010?1?00?00?????0?01?????????1
?????10110?????01000?001??100?1??????20?????????100

Siderops\_kehli

0000000001000001100010?0011001000001010001011000011?000010?0?010100?0001010
201010100000111010101000000001001110111100001100011101000100010111?110000000
011100???20100000000?00000000010010100010?11111010000111110000000?1000????
00?100000000?0?0?0????00011101110001100011000{0
1}01100200?000000100000202?1?0????101???1???01000?001??10??1??????00?1???
???000

Batrachosuchus\_watsoni

0000000001000001100010?0011001000001010001011000011?000010?1010010?0001010
2?10101000001110101000000001001110111100001101011101000100010111?110000000
001200?????????????????????00?00?????????????????????1?????0000?0?1000????
00?1010000000000001???0011101111??1100000???01021??0????????????????????????
?????????????????01000?001??10??1?????00?????????10?

Plagiosuchus\_pustuliferus

011000000100000110000000011000010000010101010100001?100010010100010?0001011
2?10101000101110001000000001001110111100000100011101000100010111?110000001
0?????1?021100200011?00000010010101100110?11010010000111110010010?100?0100

011?0101??000000001??00011001110?1010000000??01021?0000?????????????????  
????????????????010111?301??100?1?????00?????????00?

*Gerrothorax pulcherrimus*

001000000100000100000000011000010000010101010100001?10001001010010?0001011  
2010101000100110001000000001001110121100001100011101000100000111?110000000  
00120111021100200011?00000010010101100100?11010010111101110020010110011100  
0101030000000000000100000111011{0  
1}0010100000000111002000000?????0011222211?1?????1?????010100?001??10{0  
1}?10111?000?1101210000

*Edingerella madagascariensis*

000000000100000000000000000100100001101000001000010020000110101010010001010  
1010101000100010101000000001001110111100001000000011000100000101?100101001  
0111000????1000000000001?0000010010100110?111110?????1?????1000000?100010?0  
01?00000000000100010000011000100?1?1000000010011002001?00?????00?????????  
?????100?????1110001001??100?10?????0?????????100

*Benthosuchus sushkini*

000000001100000000000000000100100001101000001000010020000110101010010001010  
1010101000200110101000000001001111111110001000000011000100000101?100101000  
01110?????1000000000001?0000010010110110?110110?00001?11??0?00000000010?0  
00?000000000000000010000010101110?00100000001101000100??0?????????????????  
?????????????0110001001??100?122111000?1?1?210000

*Trematosaurus brauni*

00001100110000000000000001100100001101000001000001020000100101010010001010  
1?10101000000110111000000001001111111120000100010101000100000101?100112000  
01110?????????????????????????????0100201101?????????????????1?????0?0000?????????  
?????????????????????????????????????????????????????????????????????????????  
?????????????????????????????????????????????????????????????????????????????

*Trematolestes hagdorni*

00001100110000000000000001001100000001101000000100001020000100101010010001010  
1?1011100000011011100000000100111111112000010?01010100010000010111001120??  
0111011??10100010000000101000010020110110011111011000111111000000000001120  
10100000000000100011000010001100?0110000000110100??0000?????????????????????  
?????????????0101001001??1??1?????00?????????000

*Lyrocephaliscus euri*

10001100010000000000000001100100001101110001000001020000110101010010100010  
10101?1000200000111000001001001111100120000101011101000100000111????????????  
?111?????????????????????????????????????????????????????????????????????????  
0000000000000000001????001100??1000110????????????????????????????00?????01??0?0?1??  
?????????????010001001??0?0?????????00?1?00??0?0

*Callistomordax kugleri*

00001100010000001000001001100000001101000000100001020000100101010010001110  
1?1011100000011011100000000100111111112000010?01101000100001111?100112010  
0?????1?000100111100100101000010010110210011011011000111111000000100001100  
10100100000000100011000010001110?01100101000{0  
1}010002001?000000100?????????1?11001100?10?0010001001??10??10?????00?????  
??000

*Metoposaurus diagnosticus*

00001100010000001000001001100100001101000000000001020000100101010010001110  
20101110001011101110100000010011101111000011000111010001000011111100112111  
0111001??10110111110100100000010010110210?11011000000111011000000?00001020  
00100100000000100011000010111110?0?11?????????????????????????????????????  
?????????????01?????????????????????????????????????????????????????????

*Parotosuchus*

00000000110000000000000000000100001001010001000010020000110101010010001010  
0010101000101110101010000001001110111100001000000011000100000101?100101111

01110?0??????0????0?0??????0??????1????????????????1?????0?0000?000010?0  
01100000000000000001000001010111?10?????????????????????????????????  
????????????????110001001?0?0????????20?????????0??

Paracyclotosaurus\_davidi

000100001100000000000000000100100001001010001000010020000110101010210001010  
101010100010111010101000000100111011110000100010011000100000101?1002020??  
0111000?00110000000100110000010010110110?11111010000111?100000000000010?0  
0110000000000000001000001010111?0010001100??010??00??000010100?????????  
0?0?12121?10?0110001001?0100?1?1111020?1?0??1?000

Cyclotosaurus\_robustus

000100001100000000000000000100100001001010001000010020000110101010210001010  
101010100010111010101000001100111011110001100010011000100000101?100202101  
01110?0????11000000010??0??010010110110?11111?????1?????0?000?????????  
????????????????????????????????????????????????????????????????  
??????????????????????????????????????????????????????????????

Mastodonsaurus\_giganteus

000100001100000000000000000100000001101010001000000020000110101010110001010  
11101010001011101110100000100111011110000100010011000100000101?101202001  
01110?0??00110100000100110000010010110100?110110?00001111?0000000000010?0  
01100000000000000010000010101100001000110010010002101?020010100?????????  
??0102121?10?0110001001?0100?1?1111000?1?01010000

Rileymillerus\_cosgriffi

00000?000?????0????01???011?01?01???011100??10??1?????00??001????0010  
1?10000000001110??1??00000010?1110?1?10100011000?1011?0100000111?0?000??  
????????????????????????????????????????????????????????????2?0?00??0  
00?0?10?????0?1?????000010100011?01100010?????10?0?0?????????????????  
?????????????????0?000?001??0??1?????0?????????00?

Chinlestegophis\_jenkinsi

00000?000?00??0110001???011?010001???011100??101000001211??01010?000??1010  
2?1?0?100??1?00??????????????0110?00100000110?1????1?????0?1011?????100100  
0??????????101?????????0?????00?01010011??111?1????????????????2?0000??1  
00?101200001001?0?????0001?10??11?01?000101111?10?0110??00?????????????  
?????00??????010001001?{0 1}????1?????????1?1?00110

Eocaecilia\_micropodia

002????00100000110001???021?11001???011100??10??0??12??00?1???0??0001???  
2?100?01111?01100?1??00010110?0{0  
1}?0?00100100??1110??00?01????011?01101001000100?000???10-  
0????00200????????????????00?11101????????100??0??0330000????000111?1??1101  
0000000000101011010101000??21??01??01?1?002?0100100112?2111013?1021210101?  
00000000??1?00?02????11020?0??21110

Triadobatrachus\_massinoti ?02----

00?????11????????121?10?01?????11?????1---?00--1????1---0?????10--  
10????????????1111?????????1?1??10-1?2100000000010010?0?101000010100?00?0-  
-0001?000-21{0 1}00---10?210??10010?????????00-211211?1002111101-0--01111-  
-???1?1??121--1-2--?1?????000110?11?1001000202-??--3--110112-1---  
0010122211001-1000010001?-10101110--01?0?-?????1001001?????1-0

Karaurus\_sharovi

001?0?101100110100010000021?10001???00000?0?01????1?11---  
??1??00?????1??1?100??001????11????????????????10-  
??????????00?00?????????????10??0?00?????0????????20110?????10?210?????????  
??????00?21110100111?1111?0??02211??01210??101?1??1?2??110??00000?000011?  
0?1?0?????????????????0?12?????0?????21100?????2110100??01101?101?0?0?????  
??00?????????0??0

Kokartus\_honorarius

001???10110011?10001????0?1?10001????????????1????1?10---

??1??00?????1??1?100?00011?1?11?010?0?0?0?????10-  
001120000000110?????????0?10?0??00?00?0?????1??100?1?110?2?????????  
????????????????????????????????????????????????????????????????????  
????????????????????????????????????????????????????????????????????  
?????????????????0

*Cryptobranchus allegheniensis*

002????001000000100?1???121?10011???00100???11???1???---  
??1??00?????11???1?100?01111?1?100?10?000011-1-00-001120000000111?-?????-  
???0011?00??01?0-  
10001?111??1110?????10?211????????????????0022111111000101101-0--00111-----  
101020301--1-2----01000000210111100010002-2-2-01-3--1100-  
2001101110222111-1????0?0100?-??1011101101000000--002011010-00100

*Hynobius japonicus*

002????001001111{0

1}0010000121?10001???01100?0?01?????1???---  
??1??00?????11???2?100?01112?1?1100100000011-1-10-0021200000001110-?????-  
???0110?00??01-0-  
10001?000?21110?????10?211????????????????0022111111000101101-0--02111--  
012101000301--1-2----0100000021011110010002-2-2--1-3--1100-  
2001101110222111-1????0?0100?-??1011301101000000--012010110100100

*Ambystoma opacum*

002----00100110110001---121-10001---

00000---11-----1-----1--00-----11--?2-100-01111-1-1100100000011-1-10-  
0011200000001110---0-----1011?00?-01-0--  
0001?000?21110?????10?211????????????????0022111111000101101-0--03111--?--  
101020201--1-2----0100000121011110010002-2-2--2-3--1100-  
2001101110222111-1????0?0100?-??1011301101000000--01201010?000100

*Xenopus tropicalis*

002----00100111110011---121-10?11---

0-----?----00--10---1---0-----11---2-100-??11?1?11?0?0?????1????10-  
1001000000001100?????-----0010-00?-0--0--01010000-21110--??10?2----??1---  
-----?01-21121111002111101-0---3011-----1110-0221--0-2----00120001{1  
2}10??1-10010002-2-2----3--1101?2-1---001012221??-1-10000000011-?-111?101-  
0-?00-00--0130-00100000-0

*Epicrionops bicolor*

000????00{0 1}00000010001---011-

11001???0????-???01?001-----0??1---0-----1-???2-100-010?1-1-000-10---  
010111?00?00011010000001100-1?001---1010?01101001000100?000-01001-----10-  
21????????????????????????????????????????????????????????????1?0--03301-----1001-120---0-2---  
10112000?01011111010001?2-1?01?01?11012001001011122211???-????????????-  
010--1310-10000?1211111010100220110

*Ichthyophis bannanicus*

002----02{0 1}00000010001---011-

11001---0?00000??01?001-----0--1---0-----1-----2-100-01?11-1-000-10-0-  
?10111-00-00011010000001100-1?001---1010-01101001000100?000?01001-----10-  
21????????????????????????????????????????????????????????????1?0--03301-0---10001120---?2----  
?112000101011111010001?2-1?11?01?11012?????1011122211--?????????????-  
010000211?20000?1211111010100220110

*Leptodactylus mystacinus*

102----00100101100011---121-10?01---

00-----?----00--00---1---0---0?11---1-100001112-1-11001000?001111-10-  
10210100000011000-00-10---0010-00--0-----00010000-21110---10-2-----10--  
-----00-21121111002111101-0--02011-----0010-0121--0-2---  
100000001110111010010002-2-2----3--110112-----0010122211-01-10000000011---  
1111301101100-00--0002-00100000-0

;  
END;

BEGIN MRBAYES;  
set autoclose=yes nowarn=yes;  
lset nst=6 rates=invgamma;

```

        unlink statefreq=(all) revmat=(all) shape=(all) pinvar=(all);
        prset applyto=(all) ratepr=variable;
        mcmcp ngen= 10000000 relburnin=yes burninfrac=0.25 printfreq=1000
samplefreq=1000 nchains=4 savebrlens=yes;
        mcmc;
        sumt;
END;

```

## Part E. *Chinlestegophis* and ‘Lissamphibian Characters’

Prior comparative studies of lissamphibian morphology have identified a series of characters shared among all crown lissamphibian groups. Of these, most are preserved in soft tissue only (e.g. papilla amphibiorum, intrinsic narial musculature, green rods, Leydig cells, dermal body folds, etc., see Trueb and Cloutier, 1991), and thus only a few are thought to be identifiable in fossil relatives of lissamphibians. Of fossilizable characters, two are widely considered to hold strong evidence of lissamphibian origins: pedicellate teeth and tooth crowns with two labiolingually-oriented cusps. Other characters have also been identified as possible synapomorphies with the potential for a fossil record (holospondyly and an opercularis system in the inner ear).

Unfortunately, it is difficult to identify which of these fossilizable characters are held in common between modern lissamphibian orders due to common ancestry and which are held in common due to convergence. Holospondyly in caecilians has already been accepted as a convergence with that of batrachians, as vertebrae in the Jurassic caecilian *Eocaecilia* and the Permian batrachian *Gerobatrachus* are both rhachitinous to some degree (Jenkins et al., 2007; Anderson et al., 2008). In other cases, such as the opercularis system, there is strong evidence from modern taxa that this system was indeed present in the ancestor of all lissamphibians (reversed in caecilians, Maddin and Anderson, 2012) but its distribution amongst fossil lissamphibians is difficult to deduce, as the opercular ossicle is almost always fully cartilaginous.

This uncertainty extends to dental characters as well. In most cases, lissamphibians have ‘divided’ teeth, in which the tooth (comprised of enamel and tubular dentine) sits on top of a pillar of atubular dentine (the pedicel). ‘True’ pedicellate teeth are not co-mineralized to the pedicel, but instead are connected by a dental ligament (the ‘dividing zone’), which may either implant along the entire circumference of the crown or just the lingual surface. Pedicellate teeth are not seen throughout ontogeny; first generation teeth in caecilians fully lack a pedicel (Wake, 1976), as do early larval teeth in caudates (Davit-Béal et al., 2007). Teeth with a pedicellate morphology, but where the crown is fully mineralized to the orthodentine pedicel, are seen in late premetamorphic caudates (Davit-Béal et al., 2007). In fossil relatives of lissamphibians, pedicellularity is recognized only if a clear dividing zone is identified between the crown and implantation tissues. By this definition, pedicellularity is present in a handful of dissorophoids (*Amphibamus*, *Platyrrhinops*, *Doleserpeton*) but absent in a number of stem (*Kokartus*) and early crown caudates (*Beiyuanerpeton*, Gao and Shubin, 2012). Pedicellate morphology, but no clear dividing zone between pedicel and crown, is seen in the batrachian *Gerobatrachus* as well (Anderson et al., 2008). Whether this represents variation in hormonal maturity (either due to preservation of juvenile individuals or neoteny) or lability of the character complex among hormonally mature animals is unclear. Similarly, the wider distribution of a pedicel formed from atubular dentine, as opposed to the presence or absence of a dividing zone, is also unclear.

Bicuspidity is similarly complex. Like pedicelly, bicuspidity appears in caudates at hormonal maturity, but juvenile teeth are strictly unicuspid (Davit-Béal et al., 2007). Young teeth in early-diverging caecilians, like *Typhlonectes*, are unicuspid (Wake, 1976) although first generation teeth in some other caecilians may be ornately multicuspoid and assist in the derived behavior of maternal dermatophagy. Bicuspid teeth are known from a handful of dissorophoids (*Amphibamus grandiceps*, *Platyrrhinops lyelli*, *Doleserpeton annectens*, *Tersomius dolesensis*) but are absent from a number of other taxa more closely related to crown Batrachia (e.g. *Gerobatrachus hottoni*) and early caudates (*Kokartus*, *Beiyanerpeton*, *Pangerpeton*, Wang and Evans, 2006; Gao and Shubin, 2012; Skutchas and Martin, 2011). Although it is tempting to consider distribution of bicuspidity and pedicelly to both reflect hormonal maturity among early fossil lissamphibians, unicuspid pedicellate teeth are known from adults of some early crown salamanders (Jia and Gao, 2016), and the overall distribution of pedicelly and bicuspidity among both modern and fossil lissamphibians suggests that regulation of tooth morphology is more complex than a simple heterochrony.

Our phylogenetic hypothesis strongly supports that bicuspid, pedicellate teeth in lissamphibians had at least two origins; one in batrachians and one in caecilians, as evidenced by well-populated stem groups for both clades that broadly lack bicuspid, pedicellate teeth. This is consistent with high lability of these tooth characters among modern lissamphibians as well as among definitive fossil members of the lissamphibian crown (Gao and Shubin, 2012; Jia and Gao, 2016). This suggests to us one of two possibilities. One is that the ancestral lissamphibian either retained the latent ability to produce teeth with either bicuspid or monocuspoid morphology and pedicellate or nonpedicellate implantation, but that most early lissamphibians never produced bicuspid or pedicellate teeth. The other is that bicuspid pedicellate teeth exhibit ‘deep homology’ between modern lissamphibian orders. This could be driven by a shared derived feature of tooth morphogenesis, possibly regulation of the transition from dental cervical loop to Hertwig epithelial root sheath that predisposes a transition from one form of tooth to another. Detailed study of lissamphibian tooth development in both batrachians and caecilians will be necessary to differentiate between these possibilities.

How the dentition of *Chinlestegophis* fits into this complex story is also not clear due to the nature of the material and the limits of the imaging modalities employed here. Teeth of *Chinlestegophis* are clearly unicuspid, but whether they exhibited a clear dividing zone (and therefore pedicelly) cannot be determined from our CT data. More importantly, it is unclear whether a pedicel comprised of atubular dentine is present without a clear dividing zone; this determination would depend on destructive preparation of histological thin-sections of one or both specimens.

## **Part F. Burrowing in *Chinlestegophis***

During the 1997 field season, an area was found rich in burrows near the Derby Junction locality. Fragments of burrows that had fallen out of the cliff face were collected. Two of these burrows were found to contain bones. A search for the rest of these incomplete burrows was fruitless. Typically, burrows in the ‘red siltstone’ member are associated with floodplain deposits (Dubiel, 1992). One burrow fragment contained the partial skull of DMNH 39033. Unfortunately half of the skull was lost when the burrow broke off from the cliff. It is unknown if there



originally had been any postcranial material in the burrow. The other bone-bearing burrow contained poorly preserved, unidentifiable bone fragments.

The average burrow diameter at the field sites ranges greatly from 23 to 72 mm between different burrows (mean diameter = 45.5 mm). The typical burrow diameter at the Derby Junction site, where DMNH 39033 was collected, is approximately 42 mm. These burrows in question have relatively smooth walls and simple architecture (based upon more complete in situ burrows of similar morphology; see *SI Appendix* Fig. S8). Hasiotis and Mitchell (1989) initially described this morphology as possibly lungfish in origin, but later described a similar morphology as a simple “type III” crayfish burrow (Hasiotis et al., 1993). Although there is both taphonomic and morphological evidence that *Chinlestegophis jenkinsi* may have been fossorial, there remains the possibility that the skull was washed into a burrow or the carcass was carried in for food. Another possibility is that the disparate sizes of burrows locally at Lost Bob and Derby Junction reflect two distinct burrow makers (i.e., decapod and non-decapod, perhaps vertebrate). Indeed, the possibility of a non-decapod burrow-maker of less complex burrows at the Derby Junction locality was suggested by Hasiotis et al. (1993). To test the hypothesis that the burrows were made by two sympatric species, we measured diameters of all available in situ burrows (N = 55) at the two burrow-rich localities and assessed size distributions using Hartigan’s test for multimodality. Nevertheless, our results failed to reject the null hypothesis of unimodality at either site (Lost Bob,  $D = 0.048$ ,  $p = 0.859$ ; Derby Junction,  $D = 0.083$ ,  $p = 0.177$ ). This is consistent with the overall similarity of the burrow structures of all sizes, being roughly cylindrical and oriented completely vertically with minor flexures and a J-shaped terminus resembling burrows sometimes interpreted as decapod burrows elsewhere in the Chinle Formation. In summary, we cannot confidently determine whether the simple burrows at our field sites are decapod or vertebrate in origin, or whether they were constructed by more than one species.

There is precedence for Permo-Triassic amphibians as burrowers or secondary burrow occupants. Among known examples are the dinosaur *Acropylous*, which has been reported in burrows in the Lower Permian Blue Springs Shale of Kansas (McCahon and Miller, 2015), and the dissorophoid *Perryella*, a possible burrow maker from the Lower Permian Wellington Formation of Oklahoma (Carlson, 1987). Among stereospondyls specifically, the small rhinesuchid *Broomistega* has been reported as a secondary inhabitant of a cynodont burrow in the Lower Triassic Normandien Formation of South Africa (Fernandez et al., 2013). Burrow occupancy may have been a latent behavior more common among small temnospondyls than is currently appreciated, in which case caecilian fossoriality may represent part of a continuum of burrowing behaviors present among Permian-Triassic total group amphibians.

Headfirst burrowing is a key aspect of modern caecilian ecology. *Chinlestegophis* exhibits a number of characteristics that were likely requisite for headfirst burrowing. These characteristics fall into several broad categories: consolidation of the cranial bones to resist force of substrate compaction, changes in sensory organ morphology and location, and changes in skull shape to accommodate skull functions in confined spaces. In this regard, *Chinlestegophis* is transitional between the basal amphibian condition and the fossorially-adapted cranial skeleton of later stem caecilians (e.g. *Eocaecilia micropodia*) and crown caecilians. Reduction of ossification centres allows the skull to resist compressive forces by reducing the number of soft tissue connections (sutures) where the skull can fail under compression, and is a well-documented trend in tetrapods employing headfirst burrowing (Gans, 1960). Modern caecilians exemplify this trend by fusing the dermal skull into a small number of compound elements and

by hyperossifying the braincase into robust anterior (sphenethmoid) and posterior (os basale) elements. *Chinlestegophis* exhibits some steps in the direction of the caecilian condition. For example, the lacrimal is fused to the maxilla, forming the beginnings of the maxillopalatine element that dominates the antorbital region of the caecilian skull. The suspensorium was apparently comprised of a single co-ossified element, suggested here to represent a possible pterygoquadrate, which incorporates the pterygoid, quadrate, and epipterygoid. Although *Chinlestegophis* lacks an expanded, convex os basale that incorporates the parasphenoid, pila antotica, and prootic as in *Eocaecilia*, the exoccipitals are fused to each other posteriorly and ventrally to the basioccipital, thereby forming what could be described as an incipient os basale. A number of distinct caecilian compound ossifications are absent in *Chinlestegophis*, however, including a pseudodentary (fusion of coronoid, dentary, and splenial) and pseudoangular (fusion of articular, angular, and prearticular), the sphenethmoid, and several compound bones of the dermal skull roof.

Fossoriality is also associated with shifts in sensory adaptation. Fossorial tetrapods typically reduce sensitivity to visual and high-pitched auditory stimuli, as light and high-pitched sounds are negligible underground. In caecilians, the eyes are highly reduced or absent, the pineal organ is reduced, and the tympanic middle ear is lost. Instead, caecilians modify the nasolacrimal duct to form the chemosensory tentacular organ. *Chinlestegophis* shows reduced orbits and pineal foramen, suggesting a reduced reliance on light and visual stimuli. The middle ear, however, still retained impedance-matching capabilities, as evidenced by the retention of a conspicuous otic notch. A tympanic middle ear is lost in *Eocaecilia* and crown caecilians, although sensory epithelia retained by some caecilians indicate that loss of the ability to process high-frequency sounds was not lost immediately following the loss of the tympanic middle ear (Maddin and Anderson, 2012). There is also a well-developed nasolacrimal duct that possibly connects to a sulcus in the rim of the orbit of *Chinlestegophis*, much like *Eocaecilia*. It is unclear whether this represents the insertion of the tentacular apparatus. The above is possible evidence of the stepwise sequence of the acquisition of fossoriality in caecilians, from the use of existing burrows as shelters, or crevice occupiers, to a fully fossorial existence.

## Part G. SI Figure List

**Figure S1. Photograph of *Chinlestegophis jenkinsi* gen. et sp. nov.** Holotypic skull (DMNH 56658) in dorsal (A), ventral (B), occipital (C), left lateral (D), and right lateral (E) views.

**Figure S2. Photograph of *Chinlestegophis jenkinsi* gen. et sp. nov.** Referred specimen (DMNH 39033) in burrow shown in dorsal (A) and slight oblique dorsolateral (B) views. Note that the diameter of the burrow-fill (b f) closely approximates the width of the occupant.

**Figure S3. Right lower jaws of *Chinlestegophis* (A, B) and *Eocaecilia* (C) compared.** In A–C jaws are shown in medial (top), dorsal (middle), and ventral (bottom) views. ‘C’ is redrawn from Jenkins et al. (2007). Abbreviations: a, angular; c, coronoid; d, dentary; f im, intramandibular foramen; int p, internal process; m f, mandibular (adductor) fossa; pa, pseudoangular; part, prearticular; sa, surangular; sp, splenial.

**Figure S4. Fate of the lacrimal ossification in *Chinlestegophis*.** Position of nasolacrimal duct (purple) and palatine bone (orange) in referred specimen (DMNH 39033) in dorsal (*A*) and lateral (*B*) views, and passage of nasolacrimal duct in maxilla shown in transverse section (*C*). Passage of nasolacrimal duct (green) in lacrimal bone of *Pasawioops mayi* (adapted from Anderson and Bolt, 2013) shown for comparison. Scale is 5 mm in ‘*A*’ and ‘*B*’, dashed line shows approximate position of ‘*C*’, ‘*C*’ and ‘*D*’ not to scale. Abbreviations: mx, maxilla.

**Figure S5. Postcrania of *Chinlestegophis* holotype (DMNH 56658).** Right clavicle in ventral (*A*) and lateral (*B*) views (anterior to right). Interclavicle in ventral (*C*) and dorsal (*D*) views. Isolated limb element (ulna?) in lateral (*E*) and medial (*F*) views. Three articulated neural arches lacking their centra in left lateral (*G*) and dorsal (*H*) views (anterior to left).

**Figure S6. *Chinlestegophis* and *Rileymillerus* added to Maddin et al. data set (no other stereospondyl characters or taxa).** Tree topologies from cladistic analysis using the matrix of Maddin (2012b) place *Chinlestegophis* (asterisk) and caecilians outside lepospondyls and within Temnospondyli, but in phylogenetically disparate subclades. Note that no other stereospondyls were included in the original publication, resulting in an undersampling of stereospondyl characters. The two topologies are based on runs using Bayesian (*A*) and parsimony (*B*) analysis in MrBayes and PAUP\* 4.0, respectively. Parsimony tree in ‘*B*’ is a strict consensus of 12 equally parsimonious trees (1450 steps).

**Figure S7. *Chinlestegophis* and *Rileymillerus* added to combined matrix with stereospondyl characters and taxa.** Note that analysis combining matrices of Schoch (i.e., with stereospondyls) and Maddin resolve the positions of *Chinlestegophis*, *Rileymillerus*, and *Eocaecilia* within Stereospondyli. The clade in blue represents early batrachians (frogs and salamanders), whereas that in red represents early caecilian-like stereospondyls, including *Chinlestegophis* as a close sister taxon (asterisk). The two topologies are based on (*A*) Bayesian consensus cladogram from analysis in MrBayes and (*B*) 50% majority rule consensus of 882 equally parsimonious trees (1514 steps) from parsimony analysis in PAUP\* 4.0. Bayesian posterior probabilities are shown at nodes in ‘*A*’ and consensus indices (left of virgule) and bootstrap values equal to or greater than 50% (right of virgule) in ‘*B*.’ The complete character list and source matrix is included in Supporting Information Part C & D.

**Figure S8. Burrow structures from the Chinle Formation near Derby Junction, Eagle Basin, Colorado.**

## Part H. SI HRXCT Movies

1. 1type\_yaw.MPG—3D yaw of holotypic skull (DMNH 56658).

2. 2type\_roll.MPG—3D roll of holotypic skull (DMNH 56658).
3. 3type\_otic.MPG—3D yaw of otic notch and acoustic canal in holotype (DMNH 56658), showing supraoccipital (green), tabular (magenta), squamosal (red), and pterygoid (orange) bones in articulation.
4. 4type\_jaw.MPG—3D roll of mandible in holotype (DMNH 56658).
5. 5paratype\_yaw.MPG—3D yaw of referred (burrow) specimen (DMNH 39033).
6. 6paratype\_roll.MPG—3D roll of referred (burrow) specimen (DMNH 39033).
7. 7paratype\_jaw\_roll.MPG—3D roll of referred mandible (DMNH 39033).

## Part I. References Cited in Supporting Information

- Anderson, J. S. *et al.* A stem batrachians from the Early Permian of Texas and the origin of frogs and salamanders. *Nature* **453**, 515–518 (2008).
- Anderson, J. S. & Bolt, J. R. New information on amphibamids (Tetrapoda, Temnospondyli) from Richards Spur (Fort Sill), Oklahoma. *J. Vert. Paleontol.* **33**, 553–567 (2013).
- Bolt, J. R. & Chatterjee, S. A new temnospondyl amphibian from the Late Triassic of Texas. *J. Paleontol.* **74**, 670–683 (2000).
- Carlson, K. J. *Perryella*, a new temnospondylous amphibian from the Lower Permian of Oklahoma. *J. Paleontol.* **61**(1), 135–147 (1987).
- Davit-Beál, T., Chiksaka, H., Delgado, S., & Sire, J. Y. Amphibian teeth: current knowledge, unanswered questions, and some directions for future research. *Biol. Rev.* **82**, 49–81 (2007).
- Dubiel, R. F. Sedimentology and depositional history of the Upper Triassic Chinle Formation in the Uinta, Piceance, and Eagle Basins, northwestern Colorado and northeastern Utah. *US Geol. Surv. Bull.* **1787**, 1–25 (1992).
- Fernandez, V. *et al.* Synchrotron reveals Early Triassic odd couple: Injured amphibian and aestivating therapsid share burrow. *PLoS ONE* **8**(6): e64978. doi:10.1371/journal.pone.0064978 (2013).
- Fraser, N. C., Irmis, R. B. & Elliot, D. K. A procolophonid (Parareptilia) from the Owl Rock Member, Chinle Formation of Utah, USA. *Palaeontol. Electron.*, **8**, 13A:7p, 335KB (2005).
- Gans, C. Studies on amphisbaenians (Amphisbaenia, Reptilia). 1, A taxonomic revision of the Trogonophidae, and a functional interpretation of the amphisbaenid adaptive pattern. *Bull. Am. Mus. Nat. Hist.* 119:1-201 (1960).
- Gao, K. Q. & Shubin, N. H. Late Jurassic salamandroid from western Liaoning, China. *Proc Nat Acad. Sci.* **109**, 5767–5772 (2012).
- Hasiotis, S. T. & Mitchell, C. E. Lungfish burrows in the Upper Triassic Chinle and Delores Formations, Colorado Plateau-discussion: new evidence suggests origin by a burrowing decapod crustacean. *J. Sed. Pet.* **59**, 871–875 (1989).

- Hasiotis, S. T., Mitchell, C. E. & Dubiel, R. F. Application of morphologic burrow interpretations to discern continental burrow architects: lungfish or crayfish? *Ichnos* 2, 315–333 (1993).
- Heckert, A. B. & Lucas, S. G. First occurrence of *Aetosaurus* (Reptilia: Archosauria) in the Upper Triassic Chinle Group (USA) and its biochronological significance. *Neues Jb. Geol. Paläontol. Monat.* **1998**, 604–612 (1998).
- Huttenlocker, A. K. *et al.* Cranial morphology of recumbirostrans (Lepospondyli) from the Permian of Kansas and Nebraska, and early morphological evolution inferred by Micro-Computed Tomography. *J. Vert. Paleontol.* **33**, 540–552 (2013).
- Irmis R. B., Nesbitt S. J., Padian K., Smith N. D., Turner A. H., Woody D., & Downs A. A Late Triassic dinosauromorph assemblage from New Mexico and the rise of dinosaurs. *Science* **317**, 358–361 (2007).
- Jenkins, F. A., Walsh, D. M. & Carroll, R. L. Anatomy of *Eocaecilia micropodia*, a limbed caecilian of the Early Jurassic. *Bull. Mus. Comp. Zool.* **158**, 285–366 (2007).
- Jia, J., & Gao, K. Q. A new basal salamandroid (Amphibia, Urodela) from the Late Jurassic of Qinglong, Hebei Province, China. *PLOS One* **11(5)**: e0153834. doi:10.1371/journal.pone.0153834 (2016).
- Lebedkina, N. S. 2004. Evolution of the amphibian skull. Moscow: Pensoft Publishers. 265 pp.
- Lucas, S. G., Hunt, A. P. & Spielmann, J. A. *Rioarribasuchus*, a new name for an aetosaur from the Upper Triassic of north-central New Mexico. In *The Triassic-Jurassic Transition* (eds. Harris et al.), *New Mexico Museum of Natural History and Science Bulletin* 37, 581–582 (2006).
- Maddin, H. C., & Anderson, J. S. Evolution of the amphibian ear with implications for lissamphibian phylogeny: insight gained from the caecilian inner ear. *Fieldiana Life and Earth Sciences* **5**, 59–76 (2012).
- Maddin, H. C., Russell, A. P. & Anderson, J. S. Phylogenetic implications of the morphology of the braincase of caecilian amphibians (Gymnophiona). *Zool. J. Linn. Soc.* **166**, 160–201 (2012a).
- Maddin, H. C., Jenkins, F. A. & Anderson, J. A. The braincase of *Eocaecilia micropodia* (Lissamphibia, Gymnophonia) and the origin of caecilians. *PLOS One*, **7(12)**: e50743. doi:10.1371/journal.pone.0050743 (2012b).
- Martz, J. W. Lithostratigraphy, chemostratigraphy, and vertebrate biostratigraphy of the Dockum Group, (Upper Triassic), of southern Garza County, west Texas. PhD thesis, Texas Tech University, 504 p. (2008).
- Martz, J., Mueller, B. & Small, B. Two new aetosaurs (Archosauria, Stagonolepididae) from the Upper Triassic and Colorado, and problems in aetosaur identification and taxonomy. *J. Vert. Paleontol.* **23** (Suppl.), 76 (2003).
- Martz, J. W. *et al.* A taxonomic and biostratigraphic re-evaluation of the Post Quarry vertebrate assemblage from the Cooper Canyon Formation (Dockum Group, Upper Triassic) of southern Garza County, western Texas. *Earth Environ. Sc. Trans. Roy. Soc. Edin.* **103 (3-4)**, 339-364 DOI: 10.1017/S1755691013000376 (2013).
- McCahon, T. J. & Miller, K. B. Environmental significance of lungfish burrows (*Gnathorhiza*) within Lower Permian (Wolfcampian) paleosols of the US midcontinent. *Palaeogeogr. Palaeoclimatol. Palaeoecol.* **435**, 1–12 (2015).

- Medvedeva, E. D. On the relationship of the developing naso-lachrymal duct to the lachrymal and septomaxillary dermal bones in *Hynobius keyserlingii*. *Dokl. Akad. Nauk. SSSR* **131**, 1209–1212 (1960).
- Müller, H. Ontogeny of the skull, lower jaw, and hyobranchial skeleton of *Hypogeophis rostratus* (Amphibia: Gymnophiona: Caeciliidae) revisited. *J. Morphol.* **267** 968–986. (2006).
- Nesbitt, S. J. *et al.* Hindlimb osteology and distribution of basal dinosauiromorphs from the Late Triassic of North America. *J. Vert. Paleontol.* **29**, 498–515 (2009).
- Parker, W. G. Reassessment of the aetosaur ‘*Desmatosuchus*’ *chamaensis* with a reanalysis of the phylogeny of the Aetosauria (Archosauria: Pseudosuchia). *J. Sys. Palaeontol.* **5**, 41–68, <http://dx.doi.org/10.1017/S1477201906001994> (2007).
- Parker, W. G. Revised phylogenetic analysis of the Aetosauria (Archosauria: Pseudosuchia); assessing the effects of incongruent morphological character sets. *PeerJ* **4**:e1583; DOI 10.7717/peerj.1583 (2016).
- Parker, W. G. & Martz, J. W. The Late Triassic (Norian) Adamanian-Revueltian tetrapod faunal transition in the Chinle Formation of Petrified Forest National Park, Arizona. *Earth Environ. Sc. Trans. Roy. Soc. Edin.* **101**, 231–260 (2011).
- Schoch, R. R. Osteology of the small archosaur *Aetosaurus* from the Upper Triassic of Germany. *Neues Jb. Geol. Paläontol. Abhandlung.* **246**, 1–35 (2007).
- Schoch, R. R. A new stereospondyl from the German Middle Triassic, and the origin of the Metoposauridae. *Zool. J. Linn. Soc.* **152**, 79–113 (2008).
- Schoch, R. R. The evolution of major temnospondyl clades: an inclusive phylogenetic analysis. *J. Sys. Palaeontol.* 1–33 (2013).
- Schoch, R. R. & Milner A. R. Stereospondyli. *Handbuch der Paläoherpetologie*, vol. 3B, Pfeil, Munich, 103 pp.
- Skutchas, P., & Martin, T. Cranial anatomy of the stem salamander *Kokartus honorarius* (Amphibia: Caudata) from the Middle Jurassic of Kyrgyzstan. *Zool. J. Linn. Soc.* **161**, 816–838 (2011).
- Small, B. J. A new procolophonid from the Upper Triassic of Texas, with a description of tooth replacement and implantation. *J. Vert. Paleontol.* **17**, 674–678 (1997).
- Small, B. J. The occurrence of *Aetosaurus* in the Chinle Formation (Late Triassic, USA) and its biostratigraphic significance. *Neues Jb. Geol. Paläontol. Monat.* **1998**, 285–296 (1998).
- Small, B. J. Geology and Paleontology of the Main Elk Creek Locality (Late Triassic: Norian), Colorado. *J. Vert. Paleontol.* (Suppl.), **21**, 102 (2001).
- Small, B. J. A Late Triassic dinosauiromorph assemblage from the Eagle Basin (Chinle Formation), Colorado, USA. *J. Vert. Paleontol.* **29** (Suppl.), 182 (2009).
- Small, B. J. & Martz, J. W. A new aetosaur from the Upper Triassic Chinle Formation of the Eagle Basin, Colorado, USA, in Nesbitt, S. J., Desojo, J. B. & Irmis, R. B. (eds.) *Anatomy, Phylogeny, and Palaeobiology of Early Archosaurs and their Kin.* *Geo. Soc. Lond. Spec. Publ.* **379**, 393–412 (2013).
- Stephenson, E. M. The anatomy of the head of the New Zealand frog, *Leiopelma*. *Trans. Zool. Soc. Lond.* **27**, 255–305 (1951).
- Stewart, J. H., Poole, F. G. & Wilson, R. F. Stratigraphy and origin of the Upper Triassic Chinle Formation and related strata in the Colorado Plateau region. *US. Geol. Surv. Prof. Pap.* **690**, 1–336 (1972).

- Trueb, L. & Cloutier, R. A phylogenetic investigation of the inter- and intrarelationships of the Lissamphibia (Amphibia: Temnospondyli). In L. Trueb & H.-P. Schultze (eds.) *Origins of the Higher Groups of Tetrapods: Controversy and Consensus*. Ithaca: Cornell University Press, 223-313 (1991).
- Wake, M. H. The development and replacement of teeth in viviparous caecilians. *J. Morphol.* **148**, 33–63 (1976).
- Wang, Y., & Evans, S. E. A new short-bodied salamander from the Upper Jurassic/Lower Cretaceous of China. *Acta Palaeontol. Pol.* **51**, 127–130 (2006).
- Warren, A. & Marsicano, C. A phylogeny of the Brachyopoidea (Temnospondyli, Stereospondyli). *J. Vert. Paleontol.* **20**, 462–483 (2000).
